## **Oligodendrocytes form paranodal bridges that generate chains of myelin sheaths that are vulnerable to degeneration with age**

Cody L. Call<sup>1,2</sup>, Sarah A. Neely<sup>3</sup>, Jason J. Early<sup>3</sup>, Owen G. James<sup>4,5,6,7</sup>, Lida Zoupi<sup>8</sup>, Anna C. Williams<sup>8</sup>, Siddharthan Chandran<sup>4,5,6,7,9</sup>, David A. Lyons<sup>3</sup>, and Dwight E. Bergles<sup>1,10\*</sup>

---

<sup>1</sup> The Solomon Snyder Department of Neuroscience, Johns Hopkins University, Baltimore, Maryland 21205, USA

<sup>2</sup> Current address: Vollum Institute, Oregon Health & Science University, Portland, Oregon, 97239, USA

<sup>3</sup> Centre for Discovery Brain Sciences, University of Edinburgh, Edinburgh EH16 4SB, UK

<sup>4</sup> UK Dementia Research Institute at the University of Edinburgh, Edinburgh EH16 4SB, UK

<sup>5</sup> Centre for Clinical Brain Sciences, University of Edinburgh, Edinburgh EH16 4SB, UK

<sup>6</sup> Euan MacDonald Centre for Motor Neurone Disease Research University of Edinburgh, Edinburgh EH16 4SB, UK

<sup>7</sup> Anne Rowling Regenerative Neurology Clinic, University of Edinburgh, Edinburgh EH16 4SB, UK

<sup>8</sup> Centre for Regenerative Medicine, University of Edinburgh, 5, Little France Drive, Edinburgh, EH16 4UU, UK

<sup>9</sup> Centre for Brain Development and Repair, inStem, Bangalore 560065, India

<sup>10</sup> Johns Hopkins University Kavli Neuroscience Discovery Institute, Baltimore, Maryland 21205, USA

### Correspondence:

Dwight E. Bergles, PhD

Solomon H. Snyder Department of Neuroscience

Johns Hopkins University School of Medicine

725 N. Wolfe Street, Baltimore, MD 21205, USA

P:410-955-6939

[dbergles@jhmi.edu](mailto:dbergles@jhmi.edu)

## ABSTRACT

1 Myelin sheaths in the CNS are generated by the tips of oligodendrocyte processes, which wrap  
2 axons to accelerate action potential conduction, provide metabolic support and control  
3 excitability. Here we identify a distinct mode of myelination, conserved between zebrafish,  
4 mouse and human, in which oligodendrocytes extend myelin along individual axons by linking  
5 myelin sheaths across nodes of Ranvier (NoR). By forming thin extensions that cross NoR,  
6 which we term paranodal bridges, multiple sheaths can be connected to the soma by a single  
7 cytoplasmic process. Extensive *in vivo* live imaging-based analyses, complemented by serial  
8 electron microscopic reconstruction of paranodal bridges, revealed that many oligodendrocytes  
9 use this strategy to generate longer stretches of myelin along individual axons. In the mouse  
10 somatosensory cortex, paranodal bridges were particularly prevalent along the highly branched  
11 axons of parvalbumin expressing (PV) interneurons, which enabled oligodendrocytes to extend  
12 myelin sheaths around axon bifurcations. Sheaths at the distal ends of these chains of myelin  
13 degenerated more frequently in aged mice, suggesting that they may be more vulnerable to the  
14 aging brain environment. This previously undescribed and evolutionarily conserved feature of  
15 oligodendrocytes extends myelin coverage of individual axons without new oligodendrogenesis,  
16 which may reduce metabolic demand and preserve the fidelity of action potential propagation at  
17 axon branch points.

## 18 INTRODUCTION

19 Myelin enables rapid conduction of action potentials within the highly constrained space of the  
20 CNS and varies across brain region and neuron type. These distinct patterns of myelin are  
21 established as newly generated oligodendrocytes form multilamellar membrane sheaths around  
22 a cohort of nearby axons, selected based on diameter, geometry and cellular identity (Almeida  
23 et al., 2011; Call and Bergles, 2021; Koudelka et al., 2016; Mayoral et al., 2018; Micheva et al.,  
24 2016; Stedehouder et al., 2019, 2018, 2017; Zonouzi et al., 2019). Despite the extensive axonal  
25 territory available to oligodendrocytes during development, the length of individual myelin  
26 sheaths rarely exceeds 150  $\mu\text{m}$  in the brain, suggesting that sheath extension is tightly  
27 constrained by both cell intrinsic and extrinsic mechanisms (Bechler et al., 2015; Chong et al.,  
28 2012; Stedehouder et al., 2019). Indeed, oligodendrocytes exposed to long unbranched  
29 substrates *in vitro*, such as artificial nanofibers or dorsal root ganglion neurons, form sheaths  
30 that are comparable in length to those observed *in vivo* (Bechler et al., 2015). After a period of  
31 initial remodeling, individual myelin sheaths are extremely stable, allowing long-term control of  
32 action potential conduction (Lang and Rosenbluth, 2003; Micheva et al., 2021; Seidl and Rubel,  
33 2016), metabolic support (Lee et al., 2012; Morrison et al., 2015; Philips et al., 2021; Rinholm et  
34 al., 2011; Saab et al., 2013) and axonal excitability (Hamada and Kole, 2015; Larson et al.,  
35 2018; Schirmer et al., 2018), suggesting that the precise location of myelin shapes the  
36 functional characteristics of neuronal circuits. However, the mechanisms that control the  
37 positioning of myelin along individual axons remain to be defined.

38 The initial phase of myelination is rapid, promiscuous, and error-prone, resulting in the  
39 removal of nascent sheaths from unsuitable targets (Czopka et al., 2013; Hughes and Appel,  
40 2020; Orthmann-Murphy et al., 2020), with subsequent longitudinal extension of sheaths on  
41 appropriate axons eventually supporting conduction speeds with sub-millisecond precision  
42 (Seidl et al., 2014; Seidl and Rubel, 2016). At these sites of interaction along axons, newly  
43 generated oligodendrocytes form highly dynamic, nascent sheaths that are remodeled on the  
44 timescale of minutes (Czopka et al., 2013; Haber et al., 2009; Ioannidou et al., 2012). Despite  
45 initiating wrapping, oligodendrocytes also extend filopodia from the outermost sheath membrane  
46 (Haber et al., 2009; Hardy and Friedrich, 1996; Toth et al., 2021), suggesting that their  
47 processes continue to search for suitable targets even after initial sheath formation. However,  
48 the biological significance of these persistent dynamics and their role in generating the diverse  
49 patterns of myelination that exist in the adult CNS have not been established.

50 Individual axons in the CNS often undergo extensive branching to enable innervation of  
51 distinct brain regions and diverse targets within the terminal field. In particular, inhibitory

52 interneurons exhibit prolific axonal branching, allowing the relatively small number of these  
53 neurons to synchronize the large groups of excitatory neurons needed to elicit large scale  
54 rhythmic activity that occurs during discrete brain states (Cardin et al., 2009; Cobb et al., 1995;  
55 Klausberger et al., 2004; Ratnadurai-Giridharann et al., 2015; Wang and Buzsáki, 1996).  
56 Although projecting primarily locally, the highly branched axons of parvalbumin-expressing (PV)  
57 interneurons are extensively myelinated, speeding feedback inhibition to prevent runaway  
58 excitation and maintain time of arrival within distributed networks. Alterations in PV interneuron  
59 myelination have been observed in neurodegenerative diseases and psychiatric conditions,  
60 such as schizophrenia (Stedehouder and Kushner, 2017), highlighting the importance of  
61 establishing and maintaining myelination patterns on these inhibitory cells. However, the  
62 extensive branching of their axons presents challenges for myelination, as axon collateral  
63 formation interrupts sheath extension, particularly given that oligodendrocytes typically extend  
64 few primary cytoplasmic processes that exhibit limited branching (Czopka et al., 2013; Murtie et  
65 al., 2007; Orthmann-Murphy et al., 2020), constraining the formation of multiple internodes on  
66 each axon. The mechanisms that oligodendrocytes use to overcome these structural constraints  
67 to ensure myelination of highly branched axons in the CNS are not known.

68         Using a combination of longitudinal *in vivo* imaging, high resolution confocal microscopy,  
69 and volumetric serial electron microscopy (EM), we discovered that oligodendrocyte processes  
70 frequently form a “paranodal bridge,” an extension of the outer tongue of a myelin sheath, to link  
71 sheaths across nodes of Ranvier (NoR). We show that this mode of myelin sheath formation is  
72 highly conserved, existing within the developing zebrafish spinal cord, the mouse cerebral  
73 cortex, and in human oligodendrocytes within both pluripotent stem cell-derived organoids and  
74 postmortem human cortex. Paranodal bridges were formed by many oligodendrocytes  
75 examined in these species, indicating that they contribute substantially to overall myelin  
76 patterning. In layer II/III of the mouse cortex, paranodal bridges were observed at remarkably  
77 high frequency along axons of PV interneurons, which allowed myelin sheaths to extend across  
78 axon branch points. Although allowing additional sheath formation without oligodendrogenesis,  
79 the distal myelin sheaths connected by a paranodal bridge degenerated more frequently than  
80 proximal sheaths in aged mice. Together, these findings reveal a previously undescribed mode  
81 of myelin sheath generation that allows continuous myelination of axons with highly branched  
82 arbors. The reliance on production of distal sheaths through narrow paranodal bridges may  
83 render these myelin segments more vulnerable to degeneration with disease and aging.

84  
85

## 86 RESULTS

### 87 Paranodal bridges link adjacent myelin sheaths in the cerebral cortex

88 *In vivo* two photon imaging of the somatosensory cortex in adult *Mobp-EGFP* mice, in which it is  
89 possible to visualize the complete morphology of individual oligodendrocytes, including their  
90 somata, cytoplasmic processes and full complement of myelin sheaths (Hughes et al., 2018),  
91 revealed that some sheaths appeared to be isolated, without an apparent cytoplasmic process  
92 linking it to a soma (Figure 1A-C, orange sheaths). The high stability of oligodendrocytes in the  
93 cortex (Hill et al., 2018; Hughes et al., 2018; Tripathi et al., 2017; Yeung et al., 2014), and the  
94 persistence of these apparently isolated sheaths over many weeks of imaging (Figure 1C)  
95 suggested that they were unlikely to be stranded myelin internodes from oligodendrocytes that  
96 had degenerated. Inspection of the NoR gaps separating these apparently isolated sheaths  
97 from neighboring, cytoplasmic process-bearing sheaths, revealed that in each instance there  
98 was a thin bridge of EGFP-containing cytoplasm across the NoR linking the two sheaths (Figure  
99 1D), in contrast to typical neighboring sheaths that exhibited no cytoplasmic continuity (Figure  
100 1E). Although unexpected, these structures were not rare in the cortex. Complete  
101 reconstructions of oligodendrocytes revealed that many formed multiple paranodal bridges, with  
102 up to 20% of their sheaths connected by these structures (range: 0–11 sheaths; average:  $7 \pm$   
103  $1\%$ ,  $n = 34$  cells from 15 mice) (Figure 1F, blue sheaths). We hypothesized that these thin  
104 cytoplasmic connections serve as bridges to connect the distal sheath to the rest of the  
105 oligodendrocyte.

106 To define the structure of paranodal bridges, we immunostained the cerebral cortex of  
107 *Mobp-EGFP* mice with myelin basic protein (MBP) and the paranodal protein CASPR and  
108 imaged NoR at high resolution. Similar to that observed *in vivo*, thin EGFP+ cytoplasmic  
109 extensions were often visible connecting CASPR immunopositive paranodes (Figure 2A,B). In  
110 some cases, three sheaths were linked together by two sequential paranodal bridges, in which  
111 the center sheath formed paranodal bridges with both neighboring sheaths (Figure 2A,B). In  
112 these instances, the “anchoring” sheath (connected to the soma by a cytoplasmic process)  
113 could either be the first or second in the chain. Bridged NoR were otherwise indistinguishable  
114 from those that lacked paranodal bridges, as they were  $\beta$ IV-spectrin immunopositive (Figure  
115 2C), flanked by CASPR immunoreactivity (Figure 2D), and consistently MBP immunonegative  
116 (Figure 2E).

117 To examine the distribution of paranodal bridges among the complement of sheaths  
118 formed, we reconstructed the complete morphology of individual oligodendrocytes imaged *in*  
119 *vivo*. This analysis revealed that bridged sheaths typically constituted the most distal internodes,

120 allowing oligodendrocytes to extend myelin further than the reach of typical sheaths; as a result,  
121 oligodendrocytes with bridged sheaths had slightly wider territories than those without bridged  
122 sheaths (Supplemental Figure 1A-C, Figure 1F). This expansion of myelin territory was  
123 particularly apparent in sparsely myelinated regions, such as the temporal association area of  
124 the cerebral cortex. In these regions, oligodendrocyte somata are spaced several hundred  
125 micrometers apart (Supplemental Figure 2A,B), presenting challenges for establishing  
126 continuously myelinated segments. In this environment, chains of sheaths were visible  
127 extending between adjacent oligodendrocytes to form NoR (Supplemental Figure 2A,B), with  
128 paranodal bridges connecting the center-most sheath (Supplemental Figure 2C). Thus,  
129 paranodal bridge formation allows oligodendrocytes to increase the length of axon myelinated  
130 without oligodendrogenesis.

131

### 132 **Myelin sheaths connected by paranodal bridges have typical dimensions**

133 To define the features of these distal myelin sheaths relative to other myelin segments, we  
134 quantified their properties using *in vivo* two photon imaging of the somatosensory cortex in  
135 young adult *Mobp-EGFP* mice. Due to the extended period of oligodendrogenesis in the cortex,  
136 it was possible to compare sheath structure from both pre-existing and newly formed  
137 oligodendrocytes. Sheaths were defined as non-bridged, anchoring (a sheath containing a  
138 typical oligodendrocyte process as well as a cytoplasmic process connected to a bridged  
139 sheath), or bridged (a sheath with only a cytoplasmic process coming from another sheath). We  
140 refer to a combined unit of an anchoring sheath plus bridged sheath(s) as a bridge chain (Figure  
141 3A). Oligodendrocytes exhibited remarkable diversity in myelin organization in the  
142 somatosensory cortex, with bridged sheath content ranging from 0–11 (average:  $3 \pm 0.5$  bridged  
143 sheaths per cell). Only 2/34 oligodendrocytes in this region analyzed did not establish bridged  
144 sheaths, further highlighting the high incidence of this phenomenon in the cerebral cortex.  
145 Although there was a trend for pre-existing cells to have more bridged sheaths than those  
146 generated during the imaging period, this difference was not statistically significant ( $p = 0.20$   
147 Kruskal-Wallis, Figure 3B), indicating that this phenomenon is not limited to early developmental  
148 periods. The presence of paranodal bridges did not increase the total myelin sheath length of an  
149 oligodendrocyte (number of bridges:  $3 \pm 0.5$ ; total length:  $2.96 \pm 0.13$  mm;  $R = 0.26$ ,  $p = 0.14$ )  
150 (Figure 3C), consistent with previous studies indicating that oligodendrocytes tightly limit their  
151 total myelin output (Almeida et al., 2018, 2011; Bacmeister et al., 2020; Chong et al., 2012;  
152 Orthmann-Murphy et al., 2020). Sheaths connected via paranodal bridges were also similar in  
153 length to all other sheaths (Figure 3D); thus, the combined length of the “chain” of sheaths

154 connected by paranodal bridge(s) was approximately twice the length of a non-bridged sheath  
155 (Figure 3E).

156 Axons in the cerebral cortex vary markedly in their propensity for myelination, reflecting  
157 the influence of cell identity, axon diameter and signaling interactions. To determine if extension  
158 of myelin through paranodal bridges is more likely to occur on highly *versus* sparsely myelinated  
159 axons, we examined whether bridge chains formed NoR with other myelin sheaths or existed as  
160 an isolated patch without nearby myelination. Comparing the average number of neighboring  
161 sheaths revealed that bridged sheaths were more likely to form NoR with a non-bridged sheath  
162 on the other side (i.e. have >1 neighboring sheaths) (Figure 3F) (number of neighbors: bridged,  
163  $1.3 \pm 0.08$ ; non-bridged,  $0.90 \pm 0.07$ ;  $p = 2.7 \times 10^{-4}$ , two-tailed t-test). Thus, the properties of  
164 axons that increase the likelihood of myelination also promote the formation of chains of bridged  
165 myelin sheaths.

166

### 167 **Paranodal bridges are evolutionarily conserved**

168 Oligodendrocyte maturation and myelin formation in the developing zebrafish spinal cord closely  
169 resembles that observed in the mouse cerebral cortex (Czopka et al., 2013; Hughes et al.,  
170 2013; Kirby et al., 2006; Marisca et al., 2020; Orthmann-Murphy et al., 2020; Snaidero et al.,  
171 2014). To determine if paranodal bridges are used to establish myelin in other species, we  
172 examined sheaths formed by individual oligodendrocytes in the larval zebrafish spinal cord (4  
173 days post fertilization, dpf), by expressing membrane anchored EGFP (EGFP-CAAX) under  
174 control of the myelin basic protein (*mbp*) promoter. *In vivo* analysis of these sparsely labeled  
175 oligodendrocytes revealed that 31% of oligodendrocytes ( $n = 13/42$  oligodendrocytes, 41  
176 zebrafish) exhibited paranodal bridges, visible as a narrowing of the EGFP-labeled myelin  
177 membrane between adjacent myelin sheaths (Figure 4A,B). Bridged sheaths comprised  $15 \pm$   
178 3% of all sheaths in this region, and were slightly shorter on average than non-bridged sheaths  
179 at 4 dpf (non-bridged sheaths:  $29.6 \pm 2.3 \mu\text{m}$ ; bridged sheaths:  $21.2 \pm 2.4 \mu\text{m}$ ); nonetheless, the  
180 total length of linked sheaths that formed a myelin unit was approximately twice that of a normal  
181 sheath (total myelin bridge:  $52.2 \pm 4.4 \mu\text{m}$ ; repeated measures one-way ANOVA with Tukey's  
182 correction,  $n = 13$  oligodendrocytes) (Figure 4C), comparable to that observed in mouse.  
183 However, in zebrafish, anchoring sheaths were typically longer than the bridged sheath(s)  
184 (anchoring sheaths:  $29.6 \pm 3.4 \mu\text{m}$ ; bridged sheaths:  $10.6 \pm 1.9 \mu\text{m}$ ;  $p = 3.9 \times 10^{-5}$ , unpaired two-  
185 tailed t-test) (Figure 4D), and oligodendrocytes that formed paranodal bridges had more  
186 sheaths/cell (Figure 4E), but similar average sheath lengths (Figure 4F). These differences may  
187 simply reflect distinct features of target axons in the mouse cortex and the zebrafish spinal cord,

188 differences in the relative maturity of oligodendrocytes analysed, or subtle divergence between  
189 species.

190 To determine if human oligodendrocytes also link myelin sheaths through paranodal  
191 bridges, we examined the structure of oligodendrocytes in human induced pluripotent stem cell  
192 (iPSC)-derived myelinating organoids (“myelinoids”), generated using a previously described  
193 spinal cord patterning strategy (James et al., 2021). These myelinoids exhibit formation of MBP  
194 expressing oligodendrocytes within 59 days of culture, followed by robust myelination of axons  
195 by day 133, with fully compacted sheaths and morphologies consistent with human  
196 oligodendrocytes *in vivo* (James et al., 2021). Full reconstructions of oligodendrocytes in  
197 myelinoids revealed that many generated paranodal bridges (34%, 53/155 across all  
198 myelinoids) (Figure 5A-G). Similar to zebrafish, oligodendrocytes that formed paranodal bridges  
199 in myelinoids were more likely to have greater numbers of sheaths than those without bridges  
200 (without bridges:  $8 \pm 1$  sheaths; with bridges:  $11 \pm 1$  sheaths;  $p = 0.0027$ , generalized linear  
201 mixed model) (Figure 5H), with overall average sheath lengths similar for oligodendrocytes with  
202 bridged and without bridged sheaths (without bridges:  $110 \pm 5 \mu\text{m}$ ; with bridges:  $103 \pm 6 \mu\text{m}$ ;  $p >$   
203  $0.05$ , linear mixed model) (Figure 5I). Also, similar to observations in zebrafish, bridged sheaths  
204 in human myelinoids tended to be shorter on average ( $76 \pm 7 \mu\text{m}$ ) compared to both non-  
205 bridged ( $108 \pm 4 \mu\text{m}$ ) and anchoring sheaths ( $112 \pm 9 \mu\text{m}$ ,  $p < 0.001$ , generalized linear mixed  
206 model) (Figure 5J). Moreover, the cumulative length of a bridged chain was significantly longer  
207 than individual sheaths ( $194 \pm 16 \mu\text{m}$ ,  $p < 0.001$ , generalized linear mixed model) (Figure 5J). In  
208 addition, we observed that oligodendrocytes in human organoids frequently extended paranodal  
209 bridge-like processes that formed myelin sheaths on neighboring axons, a phenomenon also  
210 observed in the mouse cortex (myelinoids: 2/51 bridges; mice: 5/127 bridges) (Supplemental  
211 Figure 3A,B), suggesting that process outgrowth can result in bridged sheath formation with  
212 other nearby axons. Variations in the structure of bridged sheaths may reflect differences in the  
213 properties of the recipient axons, the myelinating environment, or the properties of the  
214 oligodendrocytes, which arise from distinct progenitor pools (Cai et al., 2005; Fogarty et al.,  
215 2005; Kessarar et al., 2006; Vallstedt et al., 2005).

216 While human myelinoid oligodendrocytes exhibit bona fide myelination, they do not  
217 replicate all aspects of the CNS environment. Therefore, to determine if paranodal bridges are  
218 also formed in the human brain, we performed CNP and CASPR immunostaining on  
219 postmortem human brain tissue from primary motor cortex (layer II/III). Remarkably, paranodal  
220 bridge-like structures between adjacent sheaths were frequently observed in these samples,  
221 with  $32.6 \pm 2\%$  of all nodes exhibiting CNP immunoreactivity extending across NoR (118/251



222 NoR across all samples) (Supplemental Figure 4A,B). Together, these findings indicate that  
223 paranodal bridges are a highly conserved feature of oligodendrocyte myelin in zebrafish, mice,  
224 and humans.

225

### 226 **Paranodal bridges are modified paranodal loops continuous with the outer tongue of** 227 **myelin**

228 To determine how paranodal bridges connect myelin sheaths across NoR, we examined their  
229 ultrastructural features by serial electron microscopy (EM), using a high-resolution EM dataset  
230 of layer II/III from the young adult mouse visual cortex (38 days old) (Dorkenwald et al., 2019).  
231 For compacted myelin sheaths contained within the bounds of this volume, cytoplasmic  
232 extensions were frequently observed connecting paranodes across NoR (19/67 nodes) (Figure  
233 6A-D, Supplemental Movie 1). In every instance, the paranodal bridge was continuous with the  
234 outer tongue of a mature myelin sheath on either side of the NoR. In addition, these bridges  
235 frequently formed a modified paranodal loop that extended down to the axonal membrane at the  
236 NoR (Figure 6A-D, yellow arrowheads), suggesting that paranodal bridges are formed by the  
237 first extensions of membrane that interact with axons, which later become the outermost layer of  
238 myelin. As observed through live imaging and immunohistochemistry, EM reconstructions  
239 confirmed that sheaths connected by bridges had no other cytoplasmic connection to an  
240 oligodendrocyte cell body.

241

### 242 **Paranodal bridges occur frequently at axon branch points**

243 Analysis of this serial EM dataset, in which the complex association of oligodendrocyte  
244 processes with axons could be visualized, revealed that the majority of paranodal bridges  
245 occurred at axon branch points (17/19 bridges) (Figure 6A, Supplemental Figure 5, Table 1). It  
246 is possible that the few paranodal bridges not associated with branch points are a remnant of  
247 earlier branching sites that were subsequently pruned with development (Buchanan et al., 2021;  
248 Portera-Cailliau et al., 2005; Yamahachi et al., 2009). Several examples of non-compacted,  
249 nascent sheaths that wrapped axons across branch points were observed in the volume  
250 (Supplemental Figure 6, Table 1). These results raise the possibility that growing sheaths  
251 extend past axon branches and subsequently split into two distinct sheaths during the  
252 compaction process, leaving the paranodal bridge to retain cytoplasmic continuity to the rest of  
253 the oligodendrocyte. We hypothesized this would most likely occur during the remodeling phase  
254 of myelination, which lasts for days after initial sheath elaboration has completed (Czopka et al.,  
255 2013; Orthmann-Murphy et al., 2020). Indeed, *in vivo* imaging of newly generated

256 oligodendrocytes in the cortex of *Mobp-EGFP* mice revealed that some nascent sheaths  
257 (generated within the first 24-48 hr after the cell appeared) split to form two distinct sheaths over  
258 the course of several days, forming a bridged sheath and an anchoring sheath separated by a  
259 NoR (Supplemental Figure 7). Similar events were also observed over a timeframe of three  
260 days in zebrafish with mosaic expression of *mbp:EGFP-CAAX* (Supplemental Figure 8A);  
261 however, these bridges were often temporary and typically resolved into a continuous sheath  
262 within 24 hours (Supplemental Figure 8B). It is possible that the reduced probability of bridge  
263 stabilization reflects differences in the architecture of axons in the zebrafish spinal cord  
264 compared with those in the cortex (Auer et al., 2018; Koudelka et al., 2016), and that bridges  
265 may be more likely to form on neurons with highly arborized axons.

266

### 267 **Paranodal bridges occur frequently on axons of PV interneurons**

268 Given observations of the high incidence of paranodal bridges across axonal branch points, we  
269 wanted to explore the relative abundance of bridges along the highly branched PV interneurons  
270 of the cortex, which despite their short axonal lengths are among the most myelinated in the  
271 cerebral cortex (Call and Bergles, 2021; Micheva et al., 2016; Stedehouder et al., 2017; Zonouzi  
272 et al., 2019). Previous histological analysis using MBP immunolabeling revealed that the  
273 presence of myelin along PV interneuron axons is related to both the length and diameter of  
274 their discrete axon segments (Stedehouder et al., 2019), revealing that proximity to branch  
275 points negatively influences myelination. To visualize the organization of myelin along PV  
276 interneuron axons relative to branch points, we generated *Mobp-EGFP; PV-Cre; Ai9* mice in  
277 which oligodendrocytes and PV interneurons are cytoplasmically labeled with EGFP and  
278 tdTomato, respectively (Call and Bergles, 2021). *In vivo* two photon imaging within cortical  
279 layers I–II/III (~60–230  $\mu\text{m}$  below the pia) revealed that PV interneuron axons had an unusually  
280 large number of paranodal bridges (Figure 7A,B). Of 20 tdTomato+ axons traced from 9 mice,  
281 30.1% of myelin sheaths were connected by paranodal bridge (68/222), with an average of  $32.8$   
282  $\pm 3\%$  bridged sheaths per axon (Figure 7C). This incidence of bridging was significantly higher  
283 than the overall proportion of bridges generated by oligodendrocytes within the same region of  
284 the cortex ( $9.6 \pm 1\%$ ,  $p = 1.9 \times 10^{-7}$ , two-sample two-tailed t-test with Bonferroni correction)  
285 (Figure 7C), which myelinate axons of several different neuron subtypes (Call and Bergles,  
286 2021; Micheva et al., 2016; Zonouzi et al., 2019), supporting the conclusion that the incidence of  
287 paranodal bridges on highly myelinated PV interneurons is influenced by their extensive axon  
288 branching.

289 Oligodendrocytes within layer II/III, where there is a high density of PV axons, exhibited  
290 a higher rate of bridged sheath formation than oligodendrocytes in layer I ( $p = 0.007$ , unpaired  
291 two-sample t-test with Bonferroni correction) (Figure 7C). Layer I PV interneuron axons are  
292 myelinated at a rate several times lower than in layer II/III (Micheva et al., 2016) and Layer I  
293 myelinated axons branch very infrequently (Call and Bergles, 2021), suggesting that regional  
294 differences in axonal morphology influence paranodal bridge formation. Indeed,  $65 \pm 8\%$  of  
295 bridged sheaths from individual layer II/III oligodendrocytes were on highly branched PV  
296 interneuron axons. Along PV interneuron axons, 69.1% of paranodal bridges crossed axon  
297 branch points, and the number of bridges per axon was positively correlated with both the extent  
298 of axon branching ( $R^2 = 0.31$ ; Figure 7D) and total myelin coverage ( $R^2 = 0.67$ ; Figure 7E). This  
299 analysis likely underestimates the incidence of branching, due to resolution limits and the  
300 challenge of observing thin axons within highly dense neuropil *in vivo*. The enrichment of  
301 paranodal bridges on PV interneurons suggests that their formation is determined by the  
302 characteristics of these neurons, rather than the features of a distinct subset of  
303 oligodendrocytes.

304

### 305 **Bridged sheaths are more susceptible to degeneration in the aged brain**

306 Normal aging is associated with a loss of myelin in humans, and oligodendrocytes have been  
307 shown to lose myelin sheaths and degenerate in older mice (Hill et al., 2018; Wang et al., 2020).  
308 To determine whether bridged sheaths exhibit greater vulnerability within the aged CNS, we  
309 used *in vivo* imaging to examine the dynamics of myelin sheaths over four to nine weeks in the  
310 somatosensory cortex of aged *Mobp-EGFP* mice (P585-P594) (Figure 8A-B). Sheaths  
311 degenerated at low rates in all regions examined (average of  $8 \pm 1$  sheaths lost per  $212 \mu\text{m} \times$   
312  $212 \mu\text{m} \times 100 \mu\text{m}$  volume, range 1-18,  $n = 14$  volumes, 3 mice) (Figure 8A,B).  
313 Oligodendrogenesis has been reported in the aged cortex (Wang et al., 2020) and myelin  
314 sheath loss also occurs during initial maturation of oligodendrocytes (Orthmann-Murphy et al.,  
315 2020), raising the possibility that this sheath loss represents remodeling of newly generated  
316 oligodendrocytes. However, we did not observe oligodendrogenesis in these imaging volumes,  
317 indicating that these changes reflect the removal of internodes by existing, mature  
318 oligodendrocytes. Time lapse imaging revealed that bridged sheaths were almost 10 times more  
319 likely to degenerate than non-bridged sheaths ( $p = 1.87 \times 10^{-4}$ , two-sample Kolmogorov-  
320 Smirnov Test) (Figure 8C,D). Moreover, when comparing the relative degeneration of pairs of  
321 sheaths (i.e. loss of bridge chain versus loss of bridged sheath only), bridged sheath-only  
322 degeneration was much more frequent (bridge chain loss:  $0.4 \pm 0.1$  sheaths per volume, range:

323 0–1; bridged sheath only loss:  $2 \pm 0.4$  sheaths per volume, range: 0–6,  $p = 0.0020$ , paired  
324 signed rank test) (Figure 8E). Together, these data indicate that distal sheaths connected by  
325 paranodal bridges are more susceptible to degeneration in the aged brain.

326

327

## 328 **DISCUSSION**

329 Myelin was among the first structures in the nervous system to be identified (Boullerne, 2016;  
330 van Leeuwenhoek, 1719). Its cellular origin was defined when individual oligodendrocytes were  
331 visualized using the Golgi stain (del Rio Hortega, 1922; Penfield, 1924), and its remarkable  
332 ultrastructure of concentric membrane wraps described through X-ray diffraction and electron  
333 microscopy shortly thereafter (Geren, 1954; Schmitt et al., 1935). Although the study of myelin  
334 has spanned many decades, this analysis has recently been reinvigorated by the ability to  
335 fluorescently label oligodendrocytes, myelin components, and recipient axons, allowing the  
336 dynamics of myelination to be described with high temporal and spatial resolution *in vivo*, the  
337 pattern of myelin along axons of distinct neuron subtypes to be defined, and the process of  
338 oligodendrocyte and myelin regeneration to be analyzed longitudinally within the intact nervous  
339 system. Using these approaches in multiple model systems, we discovered an unexpected  
340 structural feature of myelin in the CNS, in which individual myelin sheaths extend thin  
341 cytoplasmic processes across NoR, which we term paranodal bridges, to establish  
342 concatenated sheaths along a single axon, and in some cases bridge sheaths between nearby  
343 axons. This mechanism of linking internodes is highly conserved across vertebrates and  
344 enables myelin to cross axonal branch points, increasing the extent of myelin coverage along  
345 individual axons without additional oligodendrogenesis.

346

### 347 **Myelin addition through paranodal bridges**

348 Myelination of axons in the CNS proceeds in a largely opportunistic manner, in which  
349 differentiating OPCs produce highly branched processes that interact with nearby axons,  
350 extending membrane sheaths along and around axon segments that exhibit appropriate  
351 features. Morphological reconstructions suggest that each sheath is produced by a (often  
352 branched) cytoplasmic process of an oligodendrocyte in a one-to-one ratio, with cytoplasmic  
353 connections to the soma emanating at varying locations along each internode (Butt and  
354 Ransom, 1993; Czopka et al., 2013; Murtie et al., 2007; Orthmann-Murphy et al., 2020). Several  
355 studies have reported atypical cytoplasmic processes or filopodia extending from  
356 oligodendrocytes at the paranodes of developing myelin sheaths (Haber et al., 2009; Hardy and

357 Friedrich, 1996; Ioannidou et al., 2012; Toth et al., 2021); however, these structures were  
358 thought to represent transient extensions, pruned through the remodeling process that occurs  
359 during early stages of myelination (Czopka et al., 2013; Haber et al., 2009; Orthmann-Murphy et  
360 al., 2020). Our studies suggest that these structures may allow oligodendrocytes to extend  
361 processes around axon branch points and even jump to other nearby axons. Once firmly  
362 established, the two myelin segments joined by paranodal bridges remain extremely stable,  
363 persisting for > 2 months in the mouse brain, consistent with the limited turnover of myelin in the  
364 adult CNS (Hill et al., 2018; Hughes et al., 2018; Tripathi et al., 2017; Yeung et al., 2014; Young  
365 et al., 2013), indicating that these concatenated sheaths are not transient developmental  
366 structures, but rather a stable means to extend myelin along individual axons.

367         Although the proportion of sheaths connected by paranodal bridges (“bridged sheaths”)  
368 constitute less than 10% of total sheath production by most oligodendrocytes, the consistent  
369 production of bridged sheaths by oligodendrocytes yields considerable additional myelin within  
370 the cerebral cortex. For example, a 100  $\mu\text{m}$  cube of layer I of the mouse somatosensory cortex  
371 contains approximately 150 sheaths (Orthmann-Murphy et al., 2020), each with a length of  $\sim 70$   
372  $\mu\text{m}$ . If this is extrapolated to the entire layer I of the barrel field (approximately 100, 100  $\mu\text{m}$   
373 cubes), there is approximately 1,050 mm of myelin, of which 70 mm would be formed using  
374 paranodal bridges. As the average cortical oligodendrocyte produces about 3 mm total myelin  
375 by length (Orthmann-Murphy et al., 2020) (Figure 3C), the formation of bridged sheaths  
376 represents the output of  $\sim 23$  oligodendrocytes within layer I of the barrel field, substantially  
377 reducing the number of oligodendrocytes required to establish this pattern of myelin. Given that  
378 the rate of bridged sheath formation is increased in deeper layers with higher rates of axon  
379 branching, the total bridged myelin content within the entire mouse cortex may be much greater,  
380 and even higher in the human cortex where the rate of bridging was  $\sim 3$  times that observed in  
381 mice.

382         Oligodendrocytes have only a limited range of myelinogenic potential and even under  
383 optimal circumstances, such as during development or after extensive demyelination where  
384 there is abundant axonal territory to myelinate, enhanced myelin generation by individual  
385 oligodendrocytes is minimal (Orthmann-Murphy et al., 2020). The limited production of myelin  
386 by each oligodendrocyte, the low rates of oligodendrocyte generation, and the presence of  
387 highly branched axons that constrain sheath formation (Stedehouder et al., 2019), create major  
388 challenges for myelinating even highly permissible axons in the cortex. If oligodendrocytes were  
389 only able to form a single internode from each cytoplasmic process, processes would have to  
390 branch further to add additional sheaths or additional oligodendrocytes would have to be

391 generated to produce enough sheaths (of shorter lengths) to achieve continuous myelination  
392 across all branches. Moreover, in sparsely myelinated regions where individual  
393 oligodendrocytes can be separated by tens to hundreds of micrometers, additional  
394 oligodendrocytes would have to be formed to generate the single sheath needed to span the  
395 gap between cells (Supplemental Figure 2). As encounters between axons and the processes of  
396 premyelinating oligodendrocytes appear to be stochastic, a means would also have to exist to  
397 guide additional processes to these neighboring portions of axons.

398 Myelination provides significant savings in energy required to propagate action  
399 potentials, by replacing the need for continuous regeneration of action potentials with passive  
400 propagation and infrequent regeneration during saltatory conduction. However,  
401 oligodendrogenesis and myelination are energetically expensive, requiring extensive lipid and  
402 protein synthesis in a short period of time. It has been estimated that the initial energy cost  
403 required to invest in myelination is equivalent to several months of neuronal activity without  
404 myelination (Harris and Attwell, 2012). Thus, in the cortex where myelination is often sparse and  
405 discontinuous and only a small subset of axons is extensively myelinated, it may have been less  
406 advantageous to extend myelin by producing additional oligodendrocytes. The evolution of  
407 sheath production through paranodal bridges may have provided substantial advantages in  
408 energy savings, and as a result was conserved across vertebrate evolution.

409

#### 410 **Paranodal bridges enable myelin continuity across axonal branch points**

411 Volumetric EM analysis of the developing visual cortex revealed that nascent sheaths frequently  
412 extended past axonal branch points (Supplemental Figure 6), and mature paranodal bridges  
413 were remarkably frequent at axonal branch points of PV interneurons *in vivo* (Figure 7). In  
414 cortical layer II/III where the rate of PV interneuron myelination is highest and oligodendrocyte  
415 density is lowest, paranodal bridges were observed on PV interneuron axons at rates ~3-fold  
416 higher than they are generated by individual oligodendrocytes, each of which form myelin on  
417 axons from different neuron subtypes (Call and Bergles, 2021; Micheva et al., 2016;  
418 Stedehouder et al., 2017; Zonouzi et al., 2019). Given the high propensity for bridges to be  
419 found spanning axon branch points, paranodal bridges present along some unbranched axons  
420 may represent sites where branches once emerged but were later pruned away (Buchanan et  
421 al., 2021; Portera-Cailliau et al., 2005; Yamahachi et al., 2009).

422 Myelination not only enhances the speed of action potential propagation, but can also  
423 enhance the fidelity of action potential propagation by preventing failures at branch points,  
424 which have particularly low safety factors for continued propagation (Manor et al., 1991; Parnas

425 and Segev, 1979). Beyond the extreme case of conduction block, branch points have the  
426 potential to create delays in conduction in the daughter branches (Grossman et al., 1979a,  
427 1979b). For axons that branch dozens of times, control of action potential arrival at all  
428 postsynaptic targets could be easily lost if conduction fidelity and relative delays between  
429 branch points were not tightly regulated. Even small delays can have profound impacts on  
430 oscillation synchrony (Pajevic et al., 2014). Thus, myelinating across branch points using  
431 paranodal bridges may represent an efficient way to preserve conduction with limited resources.

432

### 433 **Evolutionary conservation of myelin sheath concatenation**

434 Concatenation of multiple myelin sheaths by a paranodal bridge was a consistent feature of  
435 oligodendrocytes in all three vertebrate systems examined in this study. While bridged sheaths  
436 in the adult mouse cortex were highly stable once formed, zebrafish paranodal bridges were  
437 dynamic, and were observed to form and dismantle over the course of several days.  
438 Additionally, in both fish and human myelinoids, many oligodendrocytes did not form paranodal  
439 bridges, while nearly every mouse oligodendrocyte exhibited bridged sheaths. These  
440 differences could be due to the relatively immature developmental environment or spinal cord  
441 origin of oligodendrocytes in larval zebrafish and myelinoid oligodendrocytes relative to the  
442 mouse cortex, and/ or differences in axonal structure (e.g. branching) within these tissues.  
443 Nonetheless, this comparative analysis highlights that extension of myelin through paranodal  
444 bridges is stochastic, raising the possibility that it may be modified by life experience.

445

### 446 **Aging dependent vulnerability of bridged myelin sheaths**

447 During myelin compaction, cytoplasm is extruded from the myelin lamella, a process that is  
448 critical for establishing the insulating properties of myelin (Snaidero et al., 2017, 2014). The  
449 remaining few cytoplasmic channels are used for continued transport of materials necessary for  
450 sheath maintenance. However, it has been hypothesized that reparative processes could be  
451 impaired by this structural bottleneck when faced with metabolic stress or myelin damage  
452 (Hagemeyer et al., 2012; Lappe-Siefke et al., 2003; Saab and Nave, 2017), contributing to  
453 enhanced vulnerability of oligodendrocytes to metabolic insults. Bridged sheaths are connected  
454 to the rest of the oligodendrocyte exclusively through the paranodal bridge, a thin extension of  
455 the myelinic channel through which components necessary to sustain the distal sheath need to  
456 travel. Bridged sheaths tended to exist at the periphery of an oligodendrocyte's territory  
457 (Supplemental Figure 1), increasing the distance required to deliver proteins, mRNA and  
458 metabolites. Transport defects in long axons have been described in many neurodegenerative

459 diseases, including Alzheimer's disease and multiple sclerosis (Coleman, 2005). Similarly,  
460 paranodal bridges may place constraints on homeostatic mechanisms, such as protein and  
461 organelle trafficking, that experience greater dysfunction in the aging brain (Benveniste et al.,  
462 2019; Camandola and Mattson, 2017; Mattson and Arumugam, 2018; Uzor et al., 2020).

463 As a result of their enhanced vulnerability, bridged sheaths may contribute substantially  
464 to age-related demyelination, resulting in gaps along otherwise continuously myelinated axons  
465 and alter conduction across axon branch points. Such a scenario could be particularly  
466 detrimental to cortical synchrony, as a substantial portion of myelin segments on PV  
467 interneurons are generated by paranodal bridges, and these cells are crucial for producing  
468 cortical oscillations associated with learning and memory retrieval (Cardin et al., 2009; Cobb et  
469 al., 1995; Klausberger et al., 2004; Ratnadurai-Giridharann et al., 2015; Wang and Buzsáki,  
470 1996). In most cases, gaps left by bridged sheath degeneration would be expected to become  
471 persistent, as oligodendrogenesis is rare in the aged brain (Hill et al., 2018; Wang et al., 2020).  
472 It is possible that other CNS insults that impact metabolism and cellular maintenance, such as  
473 inflammation, hypoxia and increased production of free radicals (Aboul-Enein et al., 2003;  
474 Segovia et al., 2008; Ziabreva et al., 2010), may disproportionately affect bridged sheaths and  
475 contribute to cortical dysfunction in neurodegenerative diseases. Examination of the fate of  
476 bridged sheaths in these diverse contexts will reveal their contribution to overall myelin loss,  
477 inform how these changes alter cortical circuits, and ultimately help us develop strategies to  
478 reduce their vulnerability to promote myelin stability across the lifespan.

479

480

## 481 **METHODS**

### 482 **Mouse care and use**

483 All experiments involving mice were conducted in strict accordance with protocols approved the  
484 Animal Care and Use Committee at Johns Hopkins University, in compliance with federal  
485 regulations. Female and male adult *Mobp-EGFP* mice were used for experiments and randomly  
486 assigned to experimental groups. All mice were healthy and did not display any overt behavioral  
487 phenotypes. Mice were maintained on a 12-h light/dark cycle, food and water were provided ad  
488 libitum, and housed in groups no larger than 5. Mice were housed with at least one other cage  
489 mate when possible. Three *Mobp-EGFP* mice were aged to 1.5 years before being implanted  
490 with cranial windows for our aging experiment.

491

### 492 **Mouse cranial windows**



493 Cranial window surgeries were performed as described previously (Orthmann-Murphy et al.,  
494 2020). Briefly, *Mobp-EGFP* mice were deeply anesthetized with isoflurane (5% at 1 L/min O<sub>2</sub>  
495 induction, 1.5–2% at 0.5 L/min O<sub>2</sub> maintenance) and their scalps shaved and cleaned. A portion  
496 of the scalp was removed and the underlying skull was cleaned and dried before cementing  
497 (Metabond) on a custom aluminum headplate. A 3-mm circle of skull was removed with a high-  
498 speed dental drill and replaced with a coverslip that was secured in place with VetBond and  
499 Krazy Glue. Mice recovered in their home cage on a heating pad and were monitored for at  
500 least an hour. Mice were imaged two to three weeks following window surgery.

501

### 502 ***In vivo* two-photon microscopy in mice**

503 *In vivo* imaging was performed as described previously (Orthmann-Murphy et al., 2020). Briefly,  
504 *Mobp-EGFP* mice were deeply anesthetized under isoflurane (5% at 1 L/min O<sub>2</sub>) and then  
505 transferred to a custom stage on a Zeiss 710 microscope and clamped in place by their  
506 headplate where they remained under isoflurane (1.5–2% at 0.5 L/min O<sub>2</sub> maintenance) for the  
507 remainder of the imaging session. Two-photon images were collected on a Zeiss LSM 710 or  
508 Zeiss LSM 880 microscope with a GaAsP detector and mode-locked Ti:sapphire laser  
509 (Coherent Ultra) tuned to 920 nm (*Mobp-EGFP* mice) or 1000 nm (*Mobp-EGFP; PV-Cre; Ai9*  
510 mice) with average power at the sample < 30 mW. A Zeiss coverslip-corrected 20X water-  
511 immersion objective (NA 1.0) was used to acquire 2048 x 2048 pixel (425 μm x 425 μm) z-  
512 stacks from the pia to depths of 110 μm or 230 μm (1-μm z step).

513 To quantify bridge frequency on PV axons, axons in layer II/III were fully traced using  
514 SNT in ImageJ from *in vivo* images of *Mobp-EGFP; PV-Cre; Ai9* mice. Myelin sheaths  
515 surrounding these axon traces were traced, including any paranodal bridges and cytoplasmic  
516 processes leading to oligodendrocyte cell bodies. Sheaths were labeled as either being  
517 anchoring, bridged, or undefined and bridges were labeled as either spanning a branch or not.

518

### 519 **Mouse cortical flatmount preparation**

520 Flatmount preparation was performed as described previously (Call and Bergles, 2021). Briefly,  
521 deeply anesthetized mice (100 mg/kg w/w sodium pentobarbital) were transcardially perfused  
522 with 20–25 mL warm (30–35° C) PBS followed by 20–25 mL ice-cold 4% paraformaldehyde.  
523 Cortical mantles were dissected from the underlying brain structures, unrolled, placed between  
524 two glass slides separated by 1 mm, and postfixed in 4% paraformaldehyde at 4° C for 6–12  
525 hours. Flattened cortices were removed from the clamped slides and stored in 30% sucrose in  
526 PBS for at least 24 hours until sectioned on a cryostat (Thermo Scientific Microm HM 550) at –

527 20 °C at thicknesses of 35–50 µm. Cryostat chucks were pre-frozen with TissueTek mounting  
528 medium and sectioned until flat. Flatmounts were removed from sucrose solution, covered with  
529 mounting medium dorsal-side down on a silanized glass slide, and frozen onto the prepared  
530 chuck. Care was taken to ensure complete horizontal sections were acquired by aligning the  
531 blade angle to the surface of the tissue.

532 Mice used for nodal component immunostaining were perfused only with 20–25 mL  
533 warm (30–35° C) PBS. Brains were dissected and lightly fixed for 30–60 minutes in 4% PFA.  
534 Flatmounts were lightly post-fixed in 4% PFA for 60 minutes in the clamped slide configuration.  
535 Flatmounts continued to be maintained in the clamped slide configuration during 30% sucrose  
536 incubation for at least 24 hours before sectioning.

537

### 538 **Mouse immunohistochemistry**

539 Immunohistochemistry on mouse brain was performed on free-floating tissue sections  
540 preincubated in blocking solution (5% normal donkey serum, 0.3% Triton X-100 in PBS, pH 7.4)  
541 for up to 2 hours at room temperature, then incubated for 24–48 hours at 4° C or room  
542 temperature in primary antibodies. Sections were subsequently washed in PBS before being  
543 incubated in secondary antibodies at room temperature for 2–6 hours or overnight at 4° C.  
544 Sections were mounted on slides with Aqua Polymount (Polysciences). Specific antibodies used  
545 are listed in the Key Resources Table.

546

### 547 **Mouse image processing and analysis**

548 Image registration, processing, and tracing of oligodendrocyte morphologies was performed as  
549 described previously (Orthmann-Murphy et al., 2020). High resolution imaging of individual  
550 bridged nodes was performed on a Zeiss 800 or 880 in Airyscan mode. Regions were ~45 µm x  
551 45 µm in xy with a resolution of ~1800 x 1800 pixels. Maybe more context here for nature/ origin  
552 of tissue. Z stacks ranged in depth, but had z steps of 0.18 µm. For analysis of degenerating  
553 sheaths in aged mice, individual regions acquired with a 20x objective were subdivided into  
554 quadrants of 212 µm x 212 µm x 100 µm volumes prior to beginning analysis. Quadrants that  
555 had overlying blood vessels, bone, or thickened meninges during the course of imaging were  
556 excluded from analysis. Loss of individual sheaths was detected in syGlass volumetrically by  
557 observing 10-20 µm-thick slices at a time and continuously rotating through timepoints. Lost  
558 sheaths were verified in ImageJ and their identities (bridged or non-bridged) were then  
559 determined. The density of myelination and abundance of lipofuscin at these ages were  
560 substantial, preventing accurate tracing of full morphologies of individual oligodendrocytes.

561 However, we were able to distinguish bridged sheaths by their lack of intersecting cytoplasmic  
562 process between paranodes. Neighboring sheaths that degenerated simultaneously were  
563 considered the anchoring sheath of the bridged pair.

564

### 565 **Electron microscopy analysis of mouse cortex**

566 We used the publicly available 250  $\mu\text{m}$   $\times$  140  $\mu\text{m}$   $\times$  90  $\mu\text{m}$  EM volumetric dataset of a P36  
567 mouse visual cortex layer II/III, acquired at a resolution of 3.58 nm  $\times$  3.58 nm  $\times$  40 nm  
568 (Dorkenwald et al., 2019). This dataset was automatically segmented with machine learning,  
569 and neuronal structures were subsequently validated manually through the Machine Intelligence  
570 from Cortical Networks (MICrONS) program (<https://microns-explorer.org/>). It was annotated  
571 with the online Neuroglancer interface (<https://github.com/google/neuroglancer>). Segmentation  
572 is based on cytoplasmic connectivity, and thus myelin membrane is not itself segmented, and  
573 segmentations of cytoplasmic channels within the sheath are fragmented. Thus, annotation  
574 consisted of finding nodes at low resolution by eye, and then activating segmented meshes  
575 associated with the paranodal loops and connecting these segmentations manually with  
576 adjacent cytoplasmic channels. In most cases, segmentation of paranodal bridges was  
577 continuous across both sheaths, but these were verified manually by tracing the cytoplasm  
578 between frames and confirming continuity.

579 Not all myelin sheaths were fully contained within the bounds of the volume. When  
580 possible, lack of a direct cytoplasmic process of one of the sheaths connected by paranodal  
581 bridge was confirmed by following the entirety of the outer tongue between paranodes of each  
582 sheath. Paranodal bridges identified in this dataset may be found at the coordinates listed in  
583 Table 1. These labels are the same as those used in Supplemental Figure 5.

584

### 585 **Zebrafish care and use**

586 All zebrafish studies were carried out with approval from the UK Home Office according to their  
587 regulations under the following project licences: 70/8436 and PP5258250. Zebrafish were  
588 maintained in the Queen's Medical Research Institute BVS Aquatics Facility at the University of  
589 Edinburgh. Adult zebrafish were maintained by aquatics staff under standard conditions on a 14  
590 hours light, 10 hours dark cycle. Zebrafish embryos were maintained at 28.5°C in 10 mM  
591 HEPES buffered E3 embryo medium or in conditioned aquarium water with methylene blue.  
592 Larval zebrafish were analysed between 4 -7 dpf, before zebrafish undergo sexual  
593 differentiation.

594

## 595 ***In vivo* confocal microscopy in zebrafish**

596 To fluorescently label the myelin sheaths of single oligodendrocytes fertilised zebrafish eggs  
597 were injected at the single cell stage with 1 nl of 10 ng/ $\mu$ l pTol2-mbp:EGFP-CAAX plasmid DNA  
598 (Czopka et al., 2013) and 50 ng/ $\mu$ l Tol2 transposase mRNA. Zebrafish were screened to identify  
599 isolated fluorescently labelled oligodendrocytes from 3 dpf. To screen for fluorescently labelled  
600 oligodendrocytes, larval zebrafish were first anaesthetised with MS222 before mounting them in  
601 1.5% low melting point agarose on glass coverslips. Once zebrafish were anaesthetised and  
602 mounted, oligodendrocytes in the spinal cord were selected for imaging. Z-stacks of  
603 oligodendrocyte were acquired using the LSM880 confocal microscope with Airyscanner fast  
604 and a 20x objective (Zeiss Plan-Apochromat, NA = 0.8). Z-stacks were acquired with an optimal  
605 z-step for each experiment.

606

## 607 **Zebrafish image analysis**

608 To quantify the number and lengths of myelin sheaths and paranodal bridges the segmented  
609 line tracing tool in Fiji Image J was used. Oligodendrocytes were analysed throughout the depth  
610 of each z-stack per cell. No cells were excluded from analyses unless there was too much  
611 myelin overlapping from neighbouring cells to reliably quantify myelin sheaths and paranodal  
612 bridges. One oligodendrocyte was analysed per zebrafish unless otherwise specified in figure  
613 legends.

614

## 615 **Human myelinoid generation and processing**

616 The human pluripotent stem cell-lines used in this study were obtained with full  
617 Ethical/Institutional Review Board approval by the University of Edinburgh and validated using  
618 standard methods including chromosomal analysis, pluripotency and absence of plasmid  
619 integration. The iPSC lines CS02iCTR-NTn1 (male) and CS25iCTRL-18n2 (male) were  
620 obtained from Cedars-Sinai and the embryonic stem cell-line SHEF4 (male) was obtained from  
621 the UK Stem Cell Bank. The maintenance of human pluripotent stem cells and generation of  
622 myelinoid cultures has been described recently (James et al., 2021). Briefly, cells were  
623 maintained in Essential 8 medium before being lifted into suspension and patterned towards the  
624 pMN domain of the developing spinal cord. Spheroids containing ventral, caudal neuroepithelial  
625 cells were then patterned towards a glial cell-fate using PDGF-AA before being transferred onto  
626 PTFE-coated Millicell Cell Culture Inserts (Merck) and maintained until cultures were 19 weeks  
627 old (corresponding to MI-12 in James et al., 2021).

628 Myelinoids were fixed in 4% PFA, washed, then permeabilized in 0.25% triton-X-100 in  
629 PBS for 40 minutes and blocked in 10 % normal goat serum (Vector Laboratories) + 0.25%  
630 triton-X-100 for 2 hours at RT. For CNP immuno-staining, myelinoids were incubated in citrate  
631 buffer (pH 6) at 95° C for 20 minutes followed by a further hour in blocking solution. Primary  
632 antibodies rat anti-MBP, mouse anti-CNP and rabbit anti-CASPR were incubated overnight at 4°  
633 C in blocking solution. After washing in PBS (3x 20 min), secondary antibodies (goat anti-rat,  
634 goat anti-mIgG2b and goat anti-rabbit) were incubated for 2 hours at room temperature in  
635 blocking solution. Myelinoids were stained with DAPI, washed in PBS and whole-mounted onto  
636 microscope slides (Thermo Scientific) with FluorSave (Calbiochem) and No. 1.5 coverslips  
637 (Thermo Scientific). Images were captured using a Zeiss 710 confocal microscope and  
638 analysed in FIJI using the Cell Counter and Simple Neurite Tracer plugins for counting cells and  
639 tracing myelin sheath lengths, respectively.

640

#### 641 **Human postmortem brain tissue**

642 Post-mortem brain tissue (motor cortices) from people without neurological defects were  
643 provided by a UK prospective donor scheme with full ethical approval from the UK Multiple  
644 Sclerosis Society Tissue Bank (MREC/02/2/39) and from the MRC-Edinburgh Brain Bank  
645 (16/ES/0084). The clinical history was provided by R. Nicholas (Imperial College London) and  
646 Prof. Colin Smith (Centre for Clinical Brain Sciences, Centre for Comparative Pathology,  
647 Edinburgh). Table 6 provides the details of the samples that were used in the study. The mean  
648 age of the human tissue donors was 68.5 years. Tissue blocks of 2 cm x 2 cm x 1 cm were  
649 collected, fixed, dehydrated and embedded in paraffin blocks. 4-µm sequential sections were  
650 cut and stored at room temperature.

651

#### 652 **Immunohistochemistry on human tissue**

653 Paraffin sections were rehydrated, washed in PBS and microwaved at high power for 15  
654 minutes in Vector Unmasking Solution for antigen retrieval (H-3300, Vector Laboratories). The  
655 sections were then incubated with Autofluorescent Eliminator Reagent (2160, MERCK-Millipore)  
656 for 1 minute and briefly washed in 70% ethanol for 5 minutes. Image-iT® FX Signal Enhancer  
657 (I36933, Thermo Fisher Scientific) was subsequently applied for 30 minutes at room  
658 temperature, and then the sections were washed and blocked for 1 hour with 10% normal horse  
659 serum, 0.3% Triton-X in PBS. Primary antibodies were diluted in antibody diluent solution  
660 (003118, Thermo Fisher Scientific) and sections were incubated overnight at 4° C in a  
661 humidified chamber. The next day the sections were incubated with Alexa Fluor secondary

662 antibodies for 1 1/2 hours at room temperature, counterstained with Hoechst 33342 (62249,  
663 Thermo Fisher Scientific) for the visualization of the nuclei and mounted using Mowiol® mounting  
664 medium (475904, MERCK- Millipore). The details of the antibodies used are listed in the Key  
665 Resources Table. Z-stack images were acquired from layers 2 and 3 of the human primary  
666 motor cortex with Leica TCS SP8 confocal microscope using a 63x objective. From each  
667 sample up to 14 different regions of ~62 μm x 62 μm in xy with a resolution of ~2048 x 2048  
668 pixels and a system's optimized z step were acquired and the average percentage of bridged  
669 NoR were quantified.

670

671

#### 672 **DATA AVAILABILITY STATEMENT**

673 All published image data, code, tools, and reagents will be shared on an unrestricted basis;  
674 requests should be directed to the corresponding authors. Raw tracing data files are available at  
675 [https://github.com/clcall/Call\\_ParanodalBridge\\_2022](https://github.com/clcall/Call_ParanodalBridge_2022) and summary data is included in the  
676 Source Data file. Source data are provided with this paper.

677

678

#### 679 **CODE AVAILABILITY STATEMENT**

680 MATLAB scripts and ImageJ macros are available at  
681 [https://github.com/clcall/Call\\_ParanodalBridge\\_2022](https://github.com/clcall/Call_ParanodalBridge_2022).

682

683 **TABLES**

684 **Table 1. Coordinates of annotated structures in EM**

| <b>Structure</b>                           | <b>Coordinates</b>    |
|--------------------------------------------|-----------------------|
| Paranodal bridge, ex 1                     | (72193, 63952, 855)   |
| Paranodal bridge, ex 2                     | (70662, 71212, 1739)  |
| Paranodal bridge, ex 3                     | (70814, 70922, 1719)  |
| Paranodal bridge, ex 4                     | (67112, 69208, 1325)  |
| Paranodal bridge, ex 5                     | (64033, 64461, 1821)  |
| Paranodal bridge, ex 6                     | (64614, 64365, 1849)  |
| Paranodal bridge, ex 7                     | (59767, 70131, 1546)  |
| Paranodal bridge, ex 8                     | (85462, 60888, 1411)  |
| Paranodal bridge, ex 9                     | (57748, 63678, 1539)  |
| Paranodal bridge, ex 10                    | (60714, 60856, 314)   |
| Paranodal bridge, ex 11                    | (50255, 52492, 1685)  |
| Paranodal bridge, ex 12                    | (57209, 57272, 1934)  |
| Paranodal bridge, ex 13                    | (58224, 56320, 1455)  |
| Paranodal bridge, ex 14                    | (87935, 60442, 959)   |
| Paranodal bridge, ex 15                    | (80246, 70899, 1980)  |
| Paranodal bridge, ex 16                    | (79838, 57111, 1626)  |
| Paranodal bridge, ex 17                    | (52731, 61177, 1577)  |
| Paranodal bridge, ex 18                    | (77613, 69685, 1819)  |
| Paranodal bridge, ex 19                    | (83625, 68845, 510)   |
| Nascent sheath across axonal branch, ex 1  | (75001, 48837, 712)   |
| Nascent sheath across axonal branch, ex 2  | (85627, 45930, 490)   |
| Nascent sheath across axonal branch, ex 3  | (85867, 47686, 637)   |
| Nascent sheath across axonal branch, ex 4  | (87796, 45748, 758)   |
| Nascent sheath across axonal branch, ex 5  | (101631, 46941, 1629) |
| Nascent sheath across axonal branch, ex 6  | (93856, 41533, 934)   |
| Nascent sheath across axonal branch, ex 7  | (93669, 41496, 936)   |
| Nascent sheath across axonal branch, ex 8  | (78151, 57813, 776)   |
| Nascent sheath across axonal branch, ex 9  | (94937, 42850, 1227)  |
| Nascent sheath across axonal branch, ex 10 | (93814, 45223, 999)   |
| Nascent sheath across axonal branch, ex 11 | (94831, 46041, 993)   |

|                                            |                      |
|--------------------------------------------|----------------------|
| Nascent sheath across axonal branch, ex 12 | (91433, 44479, 1119) |
| Nascent sheath across axonal branch, ex 13 | (94107, 38502, 1326) |
| Nascent sheath across axonal branch, ex 14 | (99252, 64112, 1751) |
| Nascent sheath across axonal branch, ex 15 | (79230, 40586, 1152) |
| Nascent sheath across axonal branch, ex 16 | (79764, 39486, 1147) |
| Nascent sheath across axonal branch, ex 17 | (78812, 40556, 1159) |
| Nascent sheath across axonal branch, ex 18 | (74403, 42894, 706)  |

685

686 **Table 2. Primary antibodies**

| Target Protein/markers                             | Host species | Source           | Dilution | Catalog # | Identifier        |
|----------------------------------------------------|--------------|------------------|----------|-----------|-------------------|
| GFP                                                | Chicken      | Aves Lab         | 1:4000   | GFP-1020  | RRID:AB_2307313   |
| mCherry                                            | Goat         | SicGen           | 1:5000   | AB0040    | RRID:AB_2333092   |
| MBP                                                | Mouse        | Sternberger      | 1:2000   | 808401    | RRID:AB_2564741   |
| MBP                                                | Chicken      | Aves Lab         | 1:500    | F-1005    | RRID:AB_2313550   |
| MBP                                                | Rat          | Abcam            | 1:100    | AB7349    | AB_305869         |
| $\beta$ IV-spectrin                                | Rabbit       | M. Rasband Lab   | 1:300    | N/A       | N/A               |
| Caspr                                              | Guinea pig   | M. Bhat Lab      | 1:1500   | N/A       | N/A               |
| CNP (2',3'-cyclic nucleotide 3' phosphodiesterase) | Mouse        | Atlas Antibodies | 1:1000   | AMAb91072 | RRID: AB_2665789, |
| Caspr                                              | Rabbit       | Abcam            | 1:500    | AB34151   | RRID: AB_869934   |

687

688 **Table 3. Secondary antibodies**

| Target Species | Conjugate | Source         | Dilution | Catalog #   | Identifier      |
|----------------|-----------|----------------|----------|-------------|-----------------|
| Mouse          | Cy5       | Jackson Immuno | 1:2000   | 715-175-151 | RRID:AB_2340820 |
| Goat           | Cy3       | Jackson Immuno | 1:2000   | 705-166-147 | RRID:AB_2340413 |
| Chicken        | Alexa 488 | Jackson Immuno | 1:2000   | 703-546-155 | RRID:AB_2340376 |
| Chicken        | Cy5       | Jackson Immuno | 1:2000   | 703-006-155 | RRID:AB_2340347 |
| Rabbit         | Cy3       | Jackson Immuno | 1:2000   | 711-165-152 | RRID:AB_2340817 |
| Rabbit         | Alexa 647 | Jackson Immuno | 1:2000   | 711-605-152 | RRID:AB_2340820 |
| Guinea Pig     | Cy3       | Jackson Immuno | 1:2000   | 706-165-148 | RRID:AB_2340461 |
| Guinea Pig     | Alexa 647 | Jackson Immuno | 1:2000   | 706-605-148 | RRID:AB_2340477 |



|        |           |                           |        |         |                  |
|--------|-----------|---------------------------|--------|---------|------------------|
| Rabbit | Alexa 488 | Thermo Fischer Scientific | 1:1000 | A-11008 | RRID: AB_143165  |
| Mouse  | Alexa 568 | Thermo Fischer Scientific | 1:1000 | A-21144 | RRID: AB_2535780 |
| Rat    | Alexa 488 | Thermo Fischer Scientific | 1:1000 | A-11006 | RRID: AB_2534074 |
| Rabbit | Alexa 647 | Thermo Fischer Scientific | 1:1000 | A-27040 | AB_2536101       |

689

690 **Table 5. Software and Algorithms**

| Name                          | Source                                                      | Identifier      |
|-------------------------------|-------------------------------------------------------------|-----------------|
| ZEN Blue/Black                | Zeiss                                                       | RRID:SCR_013672 |
| Fiji                          | <a href="http://fiji.sc">http://fiji.sc</a>                 | RRID:SCR_002285 |
| Simple Neurite Tracer and SNT | <a href="https://imagej.net/SNT">https://imagej.net/SNT</a> | RRID:SCR_016566 |
| Adobe Illustrator CS4         | Adobe                                                       | RRID:SCR_014198 |
| MATLAB                        | Mathworks                                                   | RRID:SCR_001622 |
| syGlass                       | IstoVisio                                                   | RRID:SCR_017961 |
| Prism                         | GraphPad                                                    | RRID:SCR_002798 |

691

692 **Table 6. Details of human donor tissue**

| Sample ID   | Sex | Age (years) | Cause of death                           | Post-mortem interval (hours) |
|-------------|-----|-------------|------------------------------------------|------------------------------|
| CO72        | M   | 77          | Pneumonia, ischaemic bowel               | 26                           |
| CO76        | M   | 87          | Pneumonia, idiopathic pulmonary fibrosis | 31                           |
| BBN001.2973 | M   | 53          | Suicide                                  | 96                           |
| BBN001.2988 | M   | 57          | Found dead                               | 64                           |

693 FIGURES

Figure 1

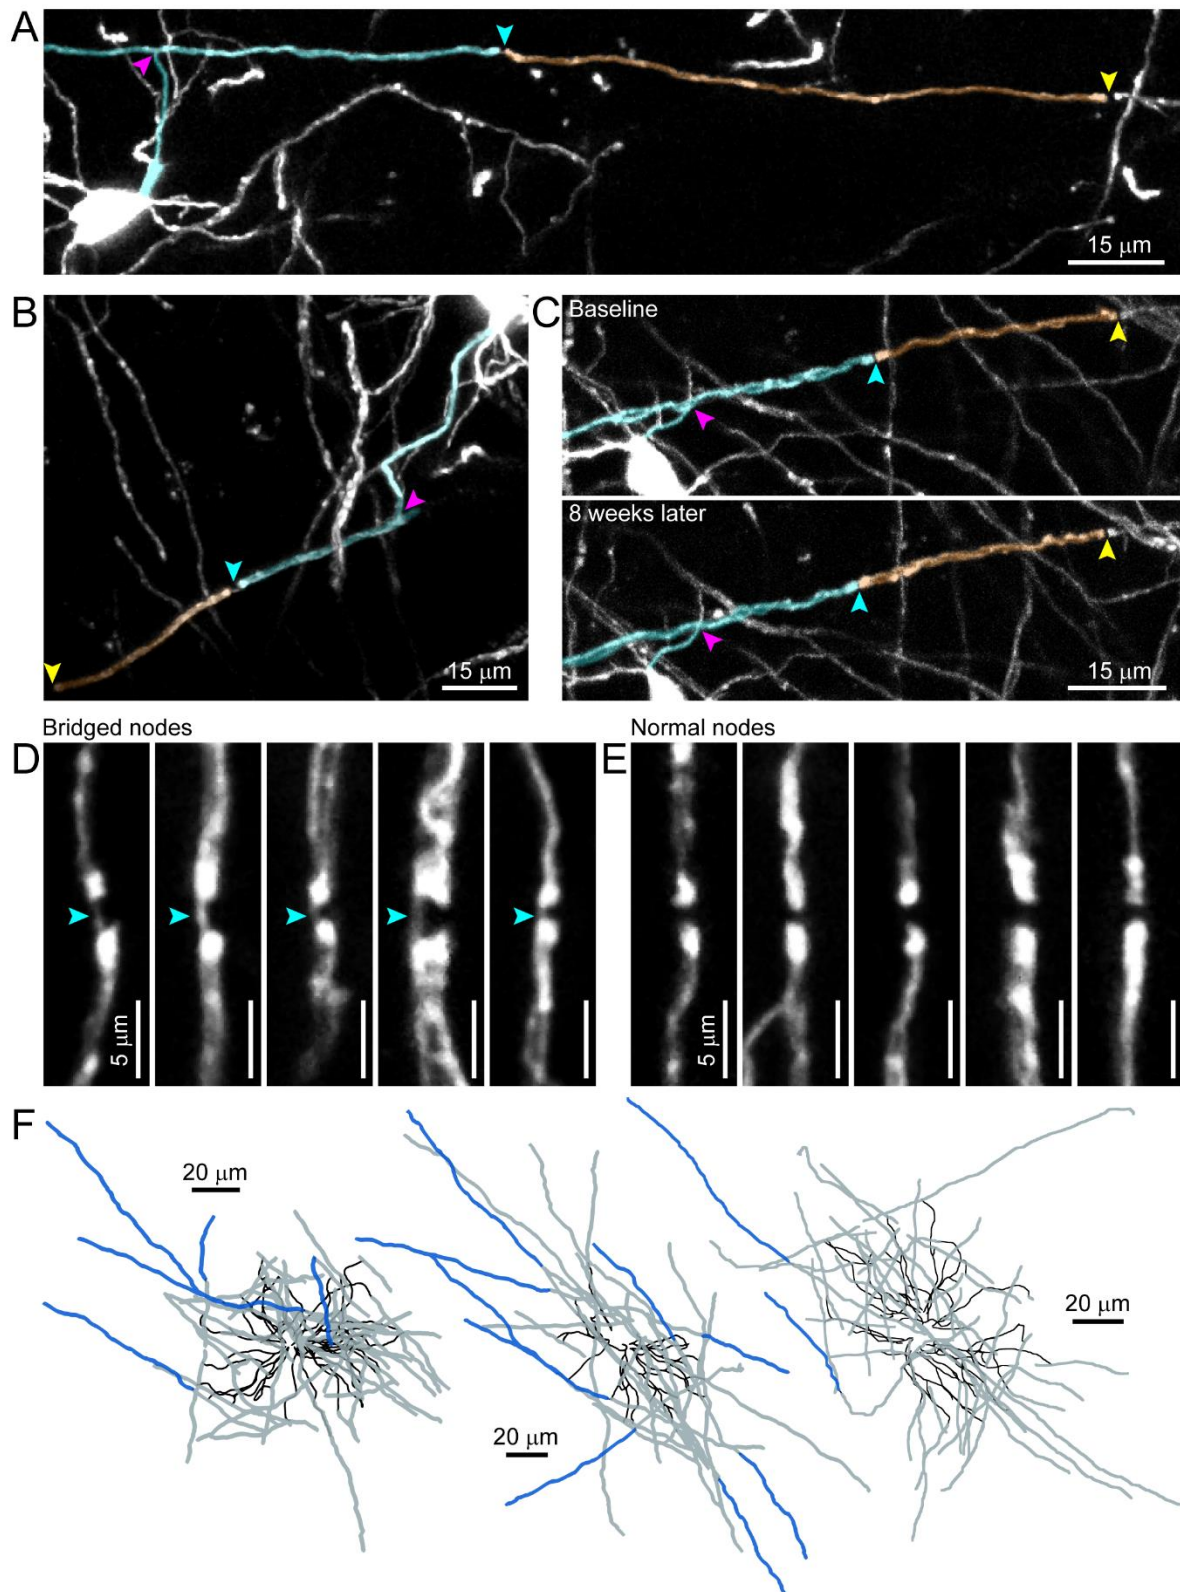

694 **Figure 1. Paranodal bridges in the mouse cerebral cortex.**

- 695 (A) A mouse cortical oligodendrocyte imaged *in vivo* sends a cytoplasmic process to a  
696 sheath (magenta arrowhead), which forms a node with an adjacent sheath *via* paranodal  
697 bridge (cyan arrowhead). This neighboring sheath terminates at the next node (yellow  
698 arrowhead), but has no connecting cytoplasmic process.
- 699 (B) Another oligodendrocyte sends a cytoplasmic process to a sheath (magenta arrowhead),  
700 which forms a node *via* paranodal bridge (cyan arrowhead) to a secondary sheath  
701 (second paranode, yellow arrowhead).
- 702 (C) An oligodendrocyte forms a pair of sheaths connected by paranodal bridge (cyan  
703 arrowhead) as in *A* and *B* as observed at a baseline imaging timepoint. Eight weeks later  
704 (bottom panel), the two sheaths and bridged node remain in nearly identical positions.  
705 Magenta arrowhead: cytoplasmic process intersection; yellow arrowhead: distal  
706 paranode of bridged sheath.
- 707 (D) Five examples of bridged nodes of Ranvier from different cells, with arrowheads  
708 indicating paranodal bridge.
- 709 (E) Five examples of unbridged nodes of Ranvier from different cells.
- 710 (F) Three examples of fully reconstructed cortical oligodendrocyte morphologies imaged *in*  
711 *vivo*. Black: cytoplasmic processes; gray: sheaths connected directly by cytoplasmic  
712 process; blue: sheaths connected *via* paranodal bridge. Cell bodies not shown.

Figure 2

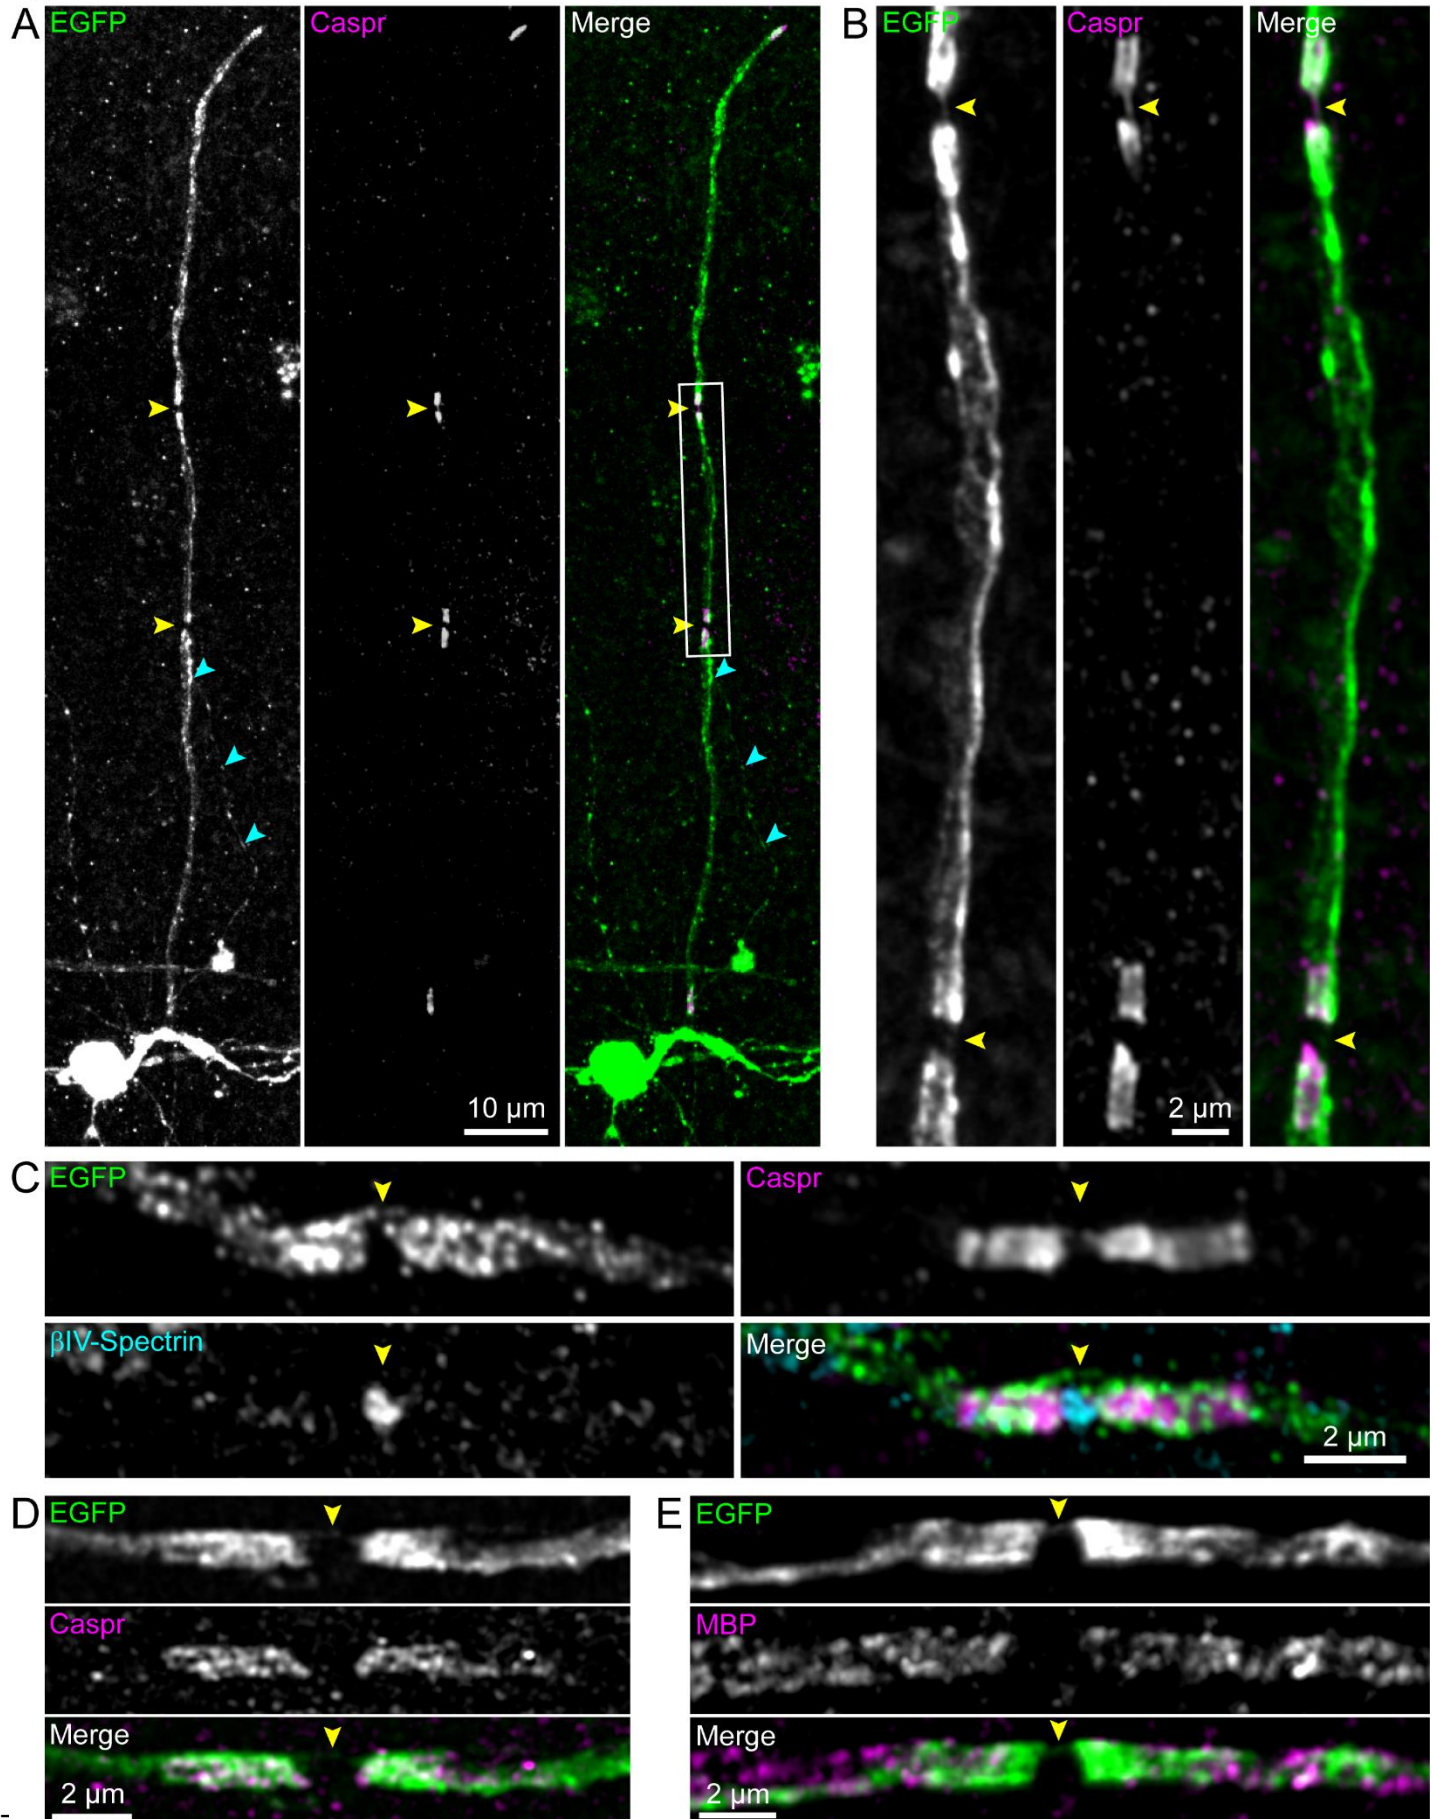

7/15

714 **Figure 2. Nodes with paranodal bridges express Caspr,  $\beta$ IV-spectrin, and lack MBP.**

- 715 (A) An individual oligodendrocyte generating a chain of three sheaths linked by two  
716 paranodal bridges (yellow arrowheads) imaged from a cortical flatmount of an *Mobp-*  
717 *EGFP* adult mouse, immunostained for EGFP (left/green) and Caspr (center/magenta).  
718 Cyan arrowheads indicate cytoplasmic process connecting the cell body to the  
719 anchoring sheath.
- 720 (B) Magnified view of the white box in A.
- 721 (C) A magnified view of a node with a paranodal bridge (yellow arrowhead), immunostained  
722 for Caspr and  $\beta$ IV-spectrin.
- 723 (D) A second example of a node with a paranodal bridge (yellow arrowhead),  
724 immunostained for Caspr.
- 725 (E) A third example of a node with a paranodal bridge (yellow arrowhead), immunostained  
726 for MBP.

Figure 3

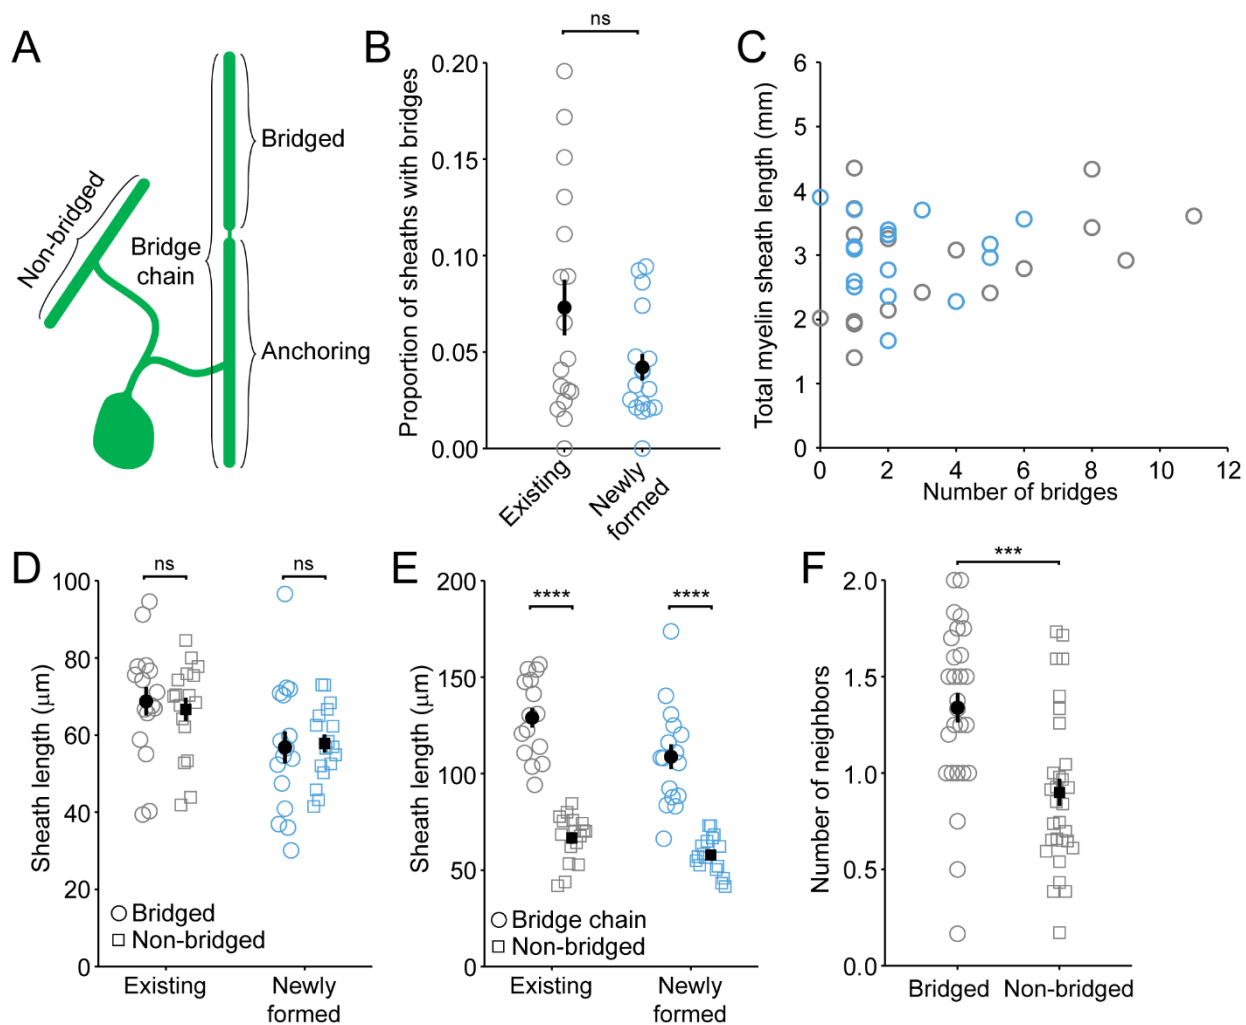

727 **Figure 3. Paranodal bridges are a common feature of oligodendrocytes and link sheaths**  
728 **of typical lengths.**

- 729 (A) Schematic depicting the categories of sheaths examined in this Figure. “Non-bridged”  
730 sheaths are canonical sheaths connected directly *via* cytoplasmic process to the cell  
731 body. “Bridged” sheaths are connected only *via* paranodal bridge from an “anchoring”  
732 sheath connected directly by a cytoplasmic process to the cell body. “Bridge chains”  
733 consist of the anchoring sheath and the sheath(s) connected to it *via* paranodal  
734 bridge(s).
- 735 (B) Bridged sheaths make up a similar proportion of the total cohort of sheaths for individual  
736 oligodendrocytes generated prior to 8 weeks of age (existing) and those generated later  
737 during *in vivo* imaging time courses (Kruskal-Wallis ANOVA,  $p = 0.20$ ).
- 738 (C) The production of bridged sheaths is not correlated with total cell size (combined length  
739 of all sheaths). existing:  $R^2 = 0.16$ ,  $p = 0.11$ ; control:  $R^2 = 2.8 \times 10^{-5}$ ,  $p = 0.98$ .
- 740 (D) Bridged sheaths (circles) have lengths similar to non-bridged sheaths (squares) across  
741 in existing cells, and in newly generated cells (blue) ( $p = 0.46$ ; Kruskal-Wallis one-way  
742 ANOVA).
- 743 (E) The combined length of all sheaths connected in a bridge chain is significantly greater  
744 than the length of non-bridged sheaths (existing:  $p = 2.8 \times 10^{-11}$ ; newly formed:  $p = 4.1 \times$   
745  $10^{-8}$ , paired two-sample t-tests with Bonferroni correction for multiple comparisons).
- 746 (F) Bridged sheaths have more neighbors than non-bridged sheaths (Data combined for  
747 existing and newly formed oligodendrocytes. Existing:  $p = 2.7 \times 10^{-4}$ , two-tailed t-test).
- 748 \*\*\* $p < 0.001$ ; \*\*\*\* $p < 0.0001$ ; ns, not significant.

Figure 4

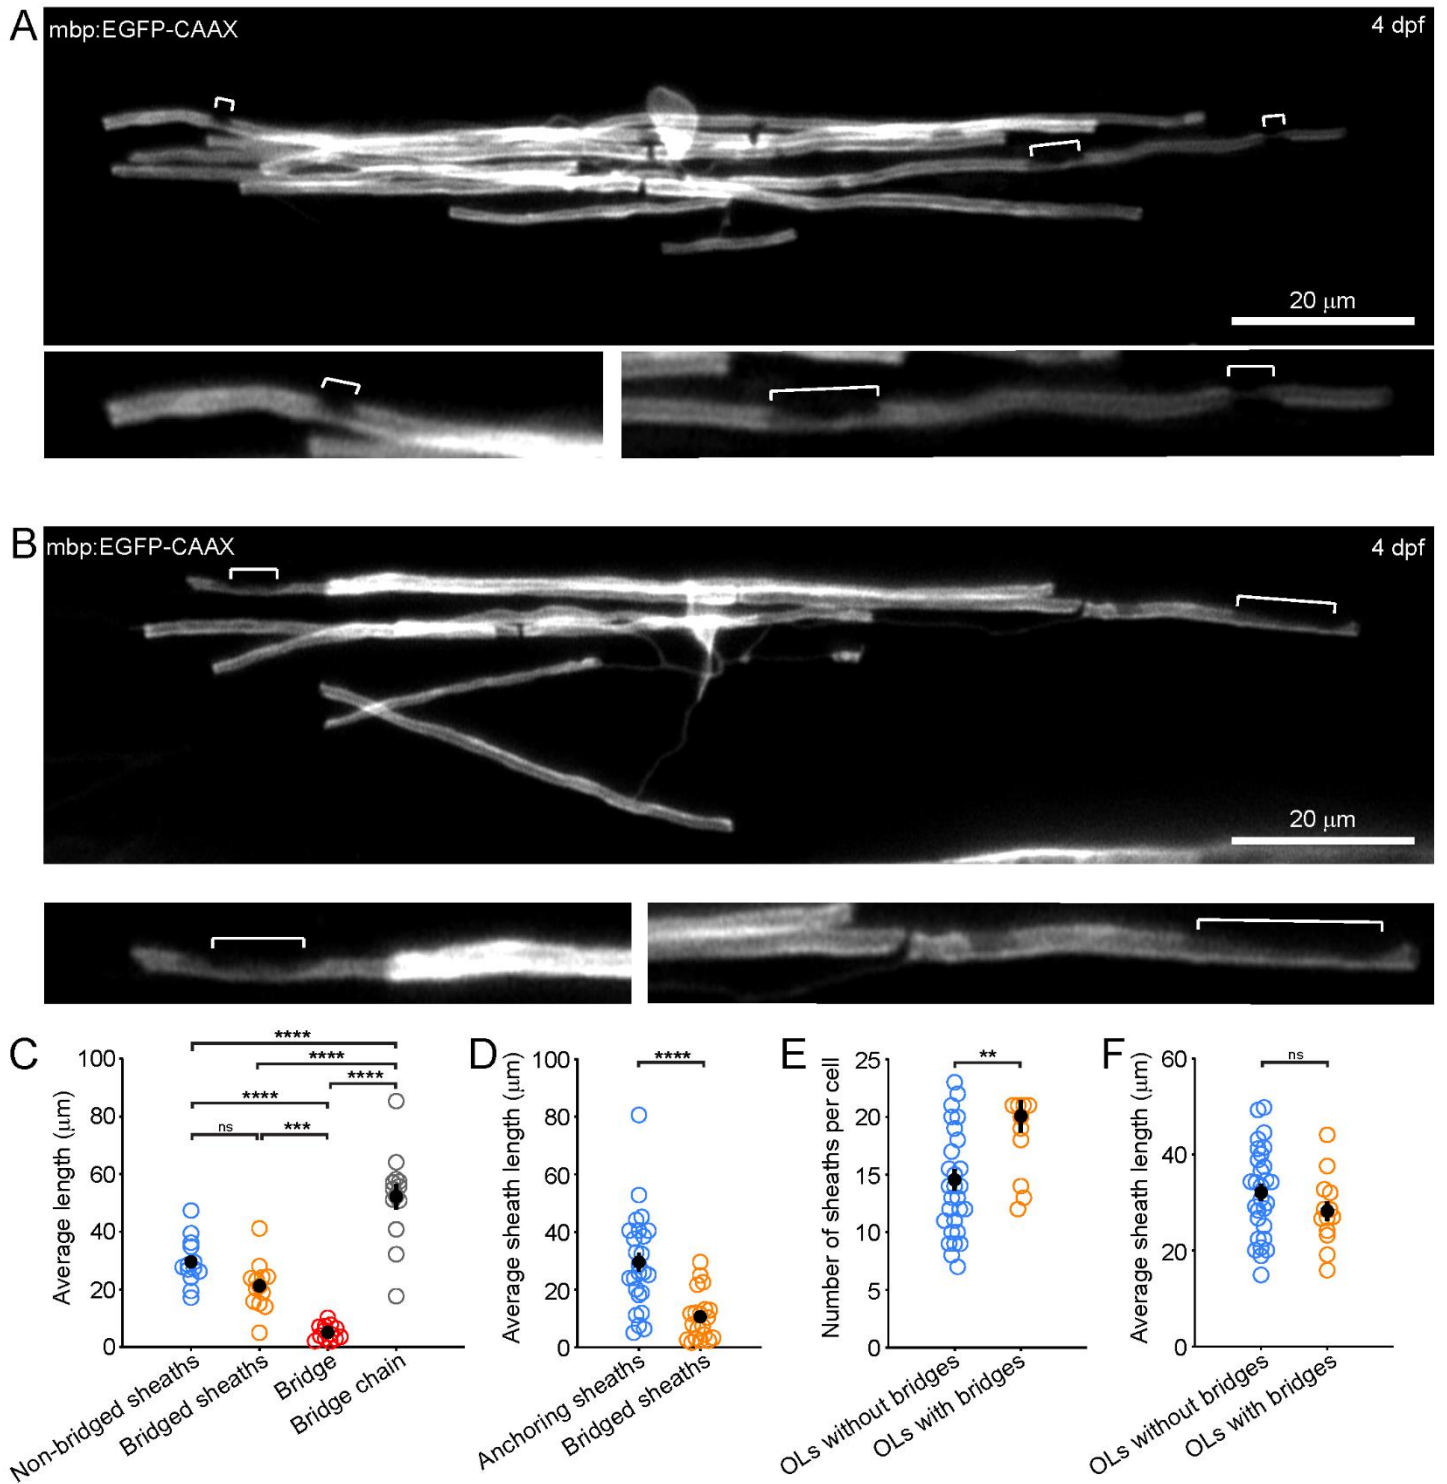



750 **Figure 4. Mature oligodendrocytes have paranodal bridges bridges in the zebrafish spinal**  
751 **cord at 4 dpf.**

752 (A) Top panel: confocal image of a single oligodendrocyte at 4 days post fertilisation with  
753 paranodal bridges, highlighted with white brackets. Bottom panels: enlarged examples of  
754 highlighted bridged nodes.

755 (B) Top panel: confocal image of a single oligodendrocyte at 4 days post fertilisation with  
756 paranodal bridges, highlighted with white brackets. Bottom panels: enlarged examples of  
757 highlighted bridged nodes.

758 (C) Average lengths of non-bridged sheaths (blue,  $25.9 \pm 1.5 \mu\text{m}$ ), bridged sheaths (orange,  
759  $21.2 \pm 2.8 \mu\text{m}$ ), paranodal bridges (red,  $5.3 \pm 0.8 \mu\text{m}$ ), and bridged chains (gray,  $49.5 \pm$   
760  $5.7 \mu\text{m}$ ). Repeated measures one-way ANOVA with Tukey's correction.  $n = 14$   
761 oligodendrocytes.

762 (D) Quantification of the sheath length of anchoring sheaths (blue,  $29.6 \pm 3.4 \mu\text{m}$ ) versus  
763 bridged sheaths (orange,  $10.6 \pm 1.9 \mu\text{m}$ )  $p = 3.9 \times 10^{-5}$ , unpaired two-tailed t-test.  $n = 25$   
764 anchoring sheaths (where 3 bridged sheaths were joined the 2 innermost sheaths were  
765 counted as anchoring sheaths) and  $n = 14$  bridged sheaths (from 13 oligodendrocytes  
766 with bridged sheaths).

767 (E) Quantification of the number of myelin sheaths produced per oligodendrocyte in  
768 oligodendrocytes without bridges (orange, mean =  $15 \pm 1$  sheaths) versus  
769 oligodendrocytes with bridges (blue,  $20 \pm 1$  sheaths)  $p = 0.0023$ , unpaired two-tailed t-  
770 test.  $n = 29$  oligodendrocytes without bridges and  $n = 13$  oligodendrocytes with bridges.

771 (F) Quantification of the average myelin sheath length produced per oligodendrocyte in  
772 oligodendrocytes without bridges (blue,  $32.1 \pm 1.7 \mu\text{m}$ ) versus oligodendrocytes with  
773 bridges (orange,  $28.2 \pm 2.1 \mu\text{m}$ )  $p = 0.19$ , unpaired two-tailed t-test.  $n = 29$   
774 oligodendrocytes without bridges and  $n = 13$  oligodendrocytes with bridges.

775 \*\* $p < 0.01$ ; \*\*\* $p < 0.001$ ; \*\*\*\* $p < 0.0001$ ; ns, not significant.

Figure 5

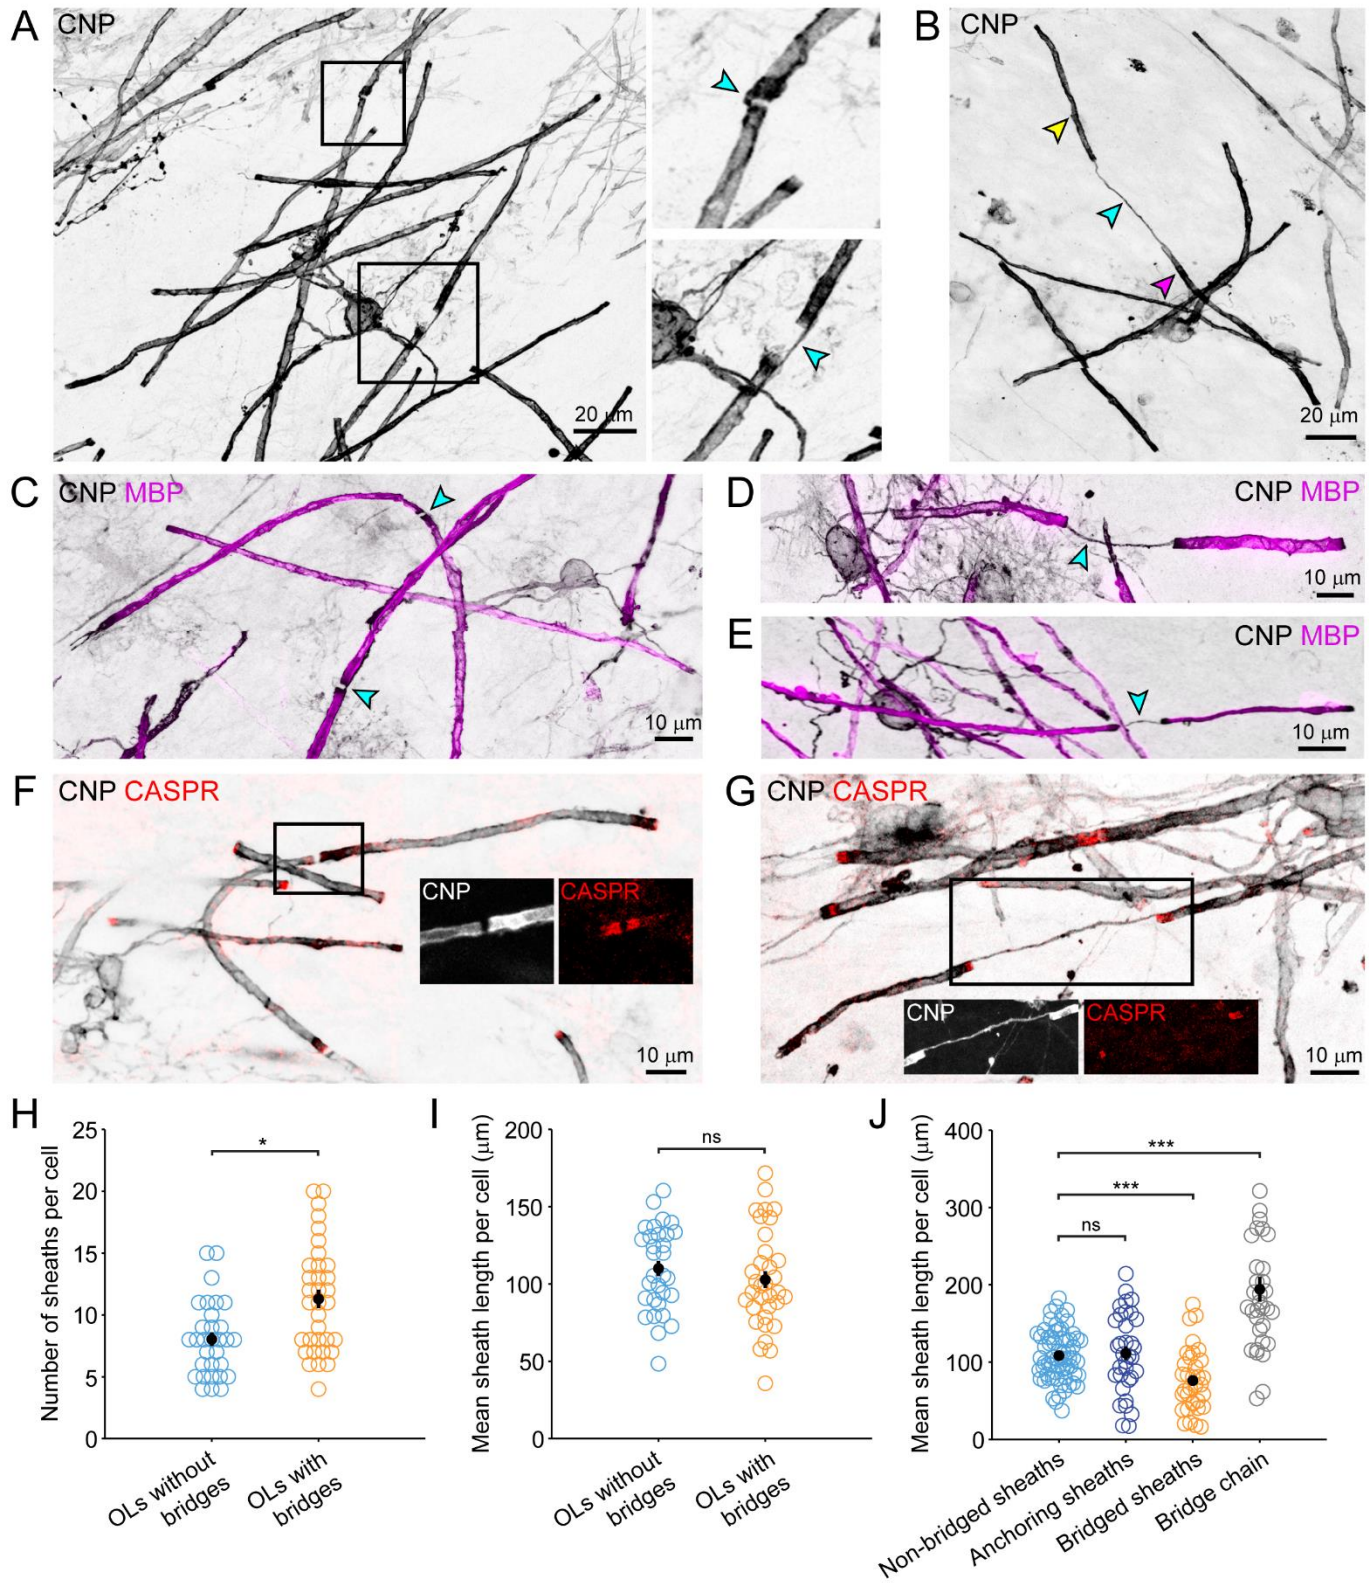

776 **Figure 5. Oligodendrocytes within human organoids have paranodal bridges**

- 777 (A) Representative image of single myelinating oligodendrocyte stained with CNPase.  
778 Squares highlight magnified paranodal bridge examples to the right. Arrowheads denote  
779 bridges.
- 780 (B) Example image of a pair of sheaths joined by a very long paranodal bridge. Arrowheads:  
781 magenta (bottom), anchoring sheath; cyan (middle), bridge; yellow (top), bridged sheath.
- 782 (C-E) MBP is excluded from bridged nodes of Ranvier.
- 783 (F-G) Representative images of paranodal bridges stained for CNPase (grayscale) and  
784 CASPR (red). Rectangles highlight region of single-channel insets.
- 785 (H) Quantification of the number of myelin sheaths per oligodendrocyte. Oligodendrocytes  
786 with bridged sheaths had a 31.2% increase in sheath number per cell compared to cells  
787 without bridges (95% confidence interval (CI): 9.9% to 56.7%  $p = 0.0027$ ; GLMM with  
788 cell-line, conversion and organoid-ID included as random effects,  $n = 31$   
789 oligodendrocytes without bridges and  $n = 34$  oligodendrocytes with bridges from 19  
790 separate organoids across three hPSC lines).
- 791 (I) Mean sheath length per cell was similar between oligodendrocytes with and without  
792 paranodal bridges (Linear mixed effects regression with cell-line, conversion and  
793 organoid-ID included as random effects,  $n = 31$  oligodendrocytes without bridges and  $n$   
794  $= 34$  oligodendrocytes with bridges from 19 separate organoids across three hPSC  
795 lines).
- 796 (J) Quantification of average length of non-bridged sheaths (light blue), anchoring sheaths  
797 (dark blue), bridged sheaths (orange) and the total length of anchored and bridged  
798 sheaths (“bridged chain,” gray). No difference was found between non-bridged and  
799 anchored myelin sheaths. Bridged sheaths were 32% shorter than non-bridged sheaths  
800 (95% CI: 19% to 49% reduction;  $p < 0.001$ ) and the total chain length was found to be  
801 74% longer than canonical non-bridged myelin sheaths (95% CI: 63% to 93%;  $p <$   
802  $0.001$ ). Linear mixed effects regression with cell-line, conversion, organoid-ID and cell-ID  
803 included as random effects,  $n = 65$  oligodendrocytes from 19 separate organoids across  
804 three hPSC lines).

Figure 6

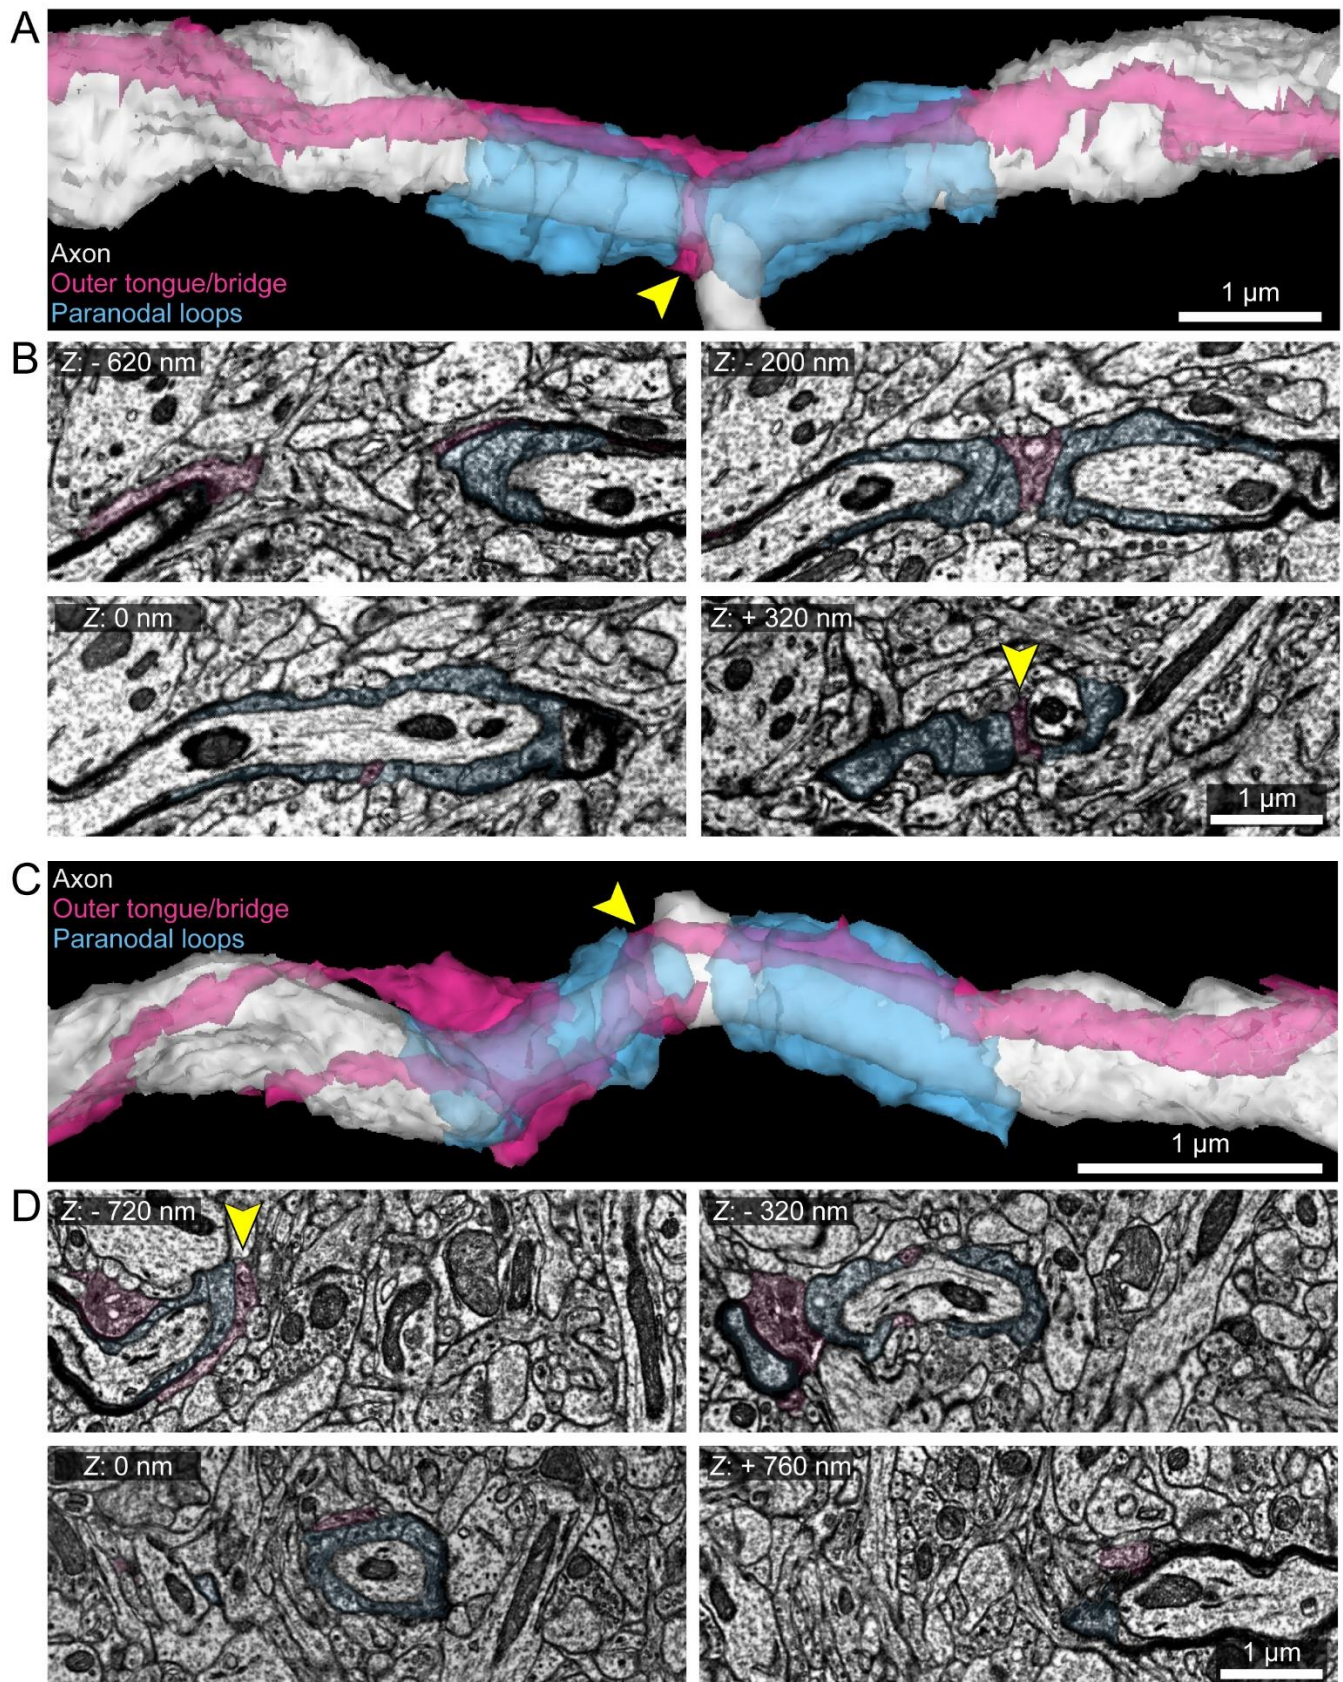

805 **Figure 6. Paranodal bridges are continuous with the outer tongue and contact the axon**  
806 **as a modified paranodal loop.**

807 (A) 3D reconstruction of a paranodal bridge identified by electron microscopy (Dorkenwald  
808 et al., 2019) and reconstructed with Neuroglancer ([https://neuroglancer-](https://neuroglancer-demo.appspot.com/)  
809 [demo.appspot.com/](https://neuroglancer-demo.appspot.com/)). The cytoplasm of the paranodal loops are cyan, and the shared  
810 outer tongue which forms the paranodal bridge (band in between the two cyan  
811 structures, yellow arrowhead) is magenta. This paranodal bridge forms across a branch  
812 point in the axon.

813 (B) Individual frames making up the paranodal bridge reconstructed in A. The frame  
814 designated as z depth of 0 nm (bottom left frame) represents the center of the axon, and  
815 the other frames are from z planes above or below this frame. At 0 nm, the paranodal  
816 bridge is seen in cross section (magenta), indistinguishable from the other paranodal  
817 loops (cyan). At -200 nm and +320 nm (right frames), the paranodal bridge is observed  
818 on either side of the axon. Yellow arrowhead in bottom right frame represents  
819 approximate position of the same arrowhead in A. At -620 nm, the cytoplasm continuous  
820 with the magenta band at -200 nm can be observed passing over the other paranodal  
821 loops to the outside of both sheaths, which is continuous with the outer tongues of both  
822 sheaths (horizontal band running across A).

823 (C) Another 3D reconstruction as in A. In this example, the paranodal bridge is observed  
824 spiraling around the axon across the paranodal loops of the left sheath.

825 (D) As in B, at -320 nm the continuous magenta cytoplasmic channel is seen in cross  
826 section on either side of the axon, appearing as a paranodal loop. This cytoplasm is  
827 continuous with the magenta cytoplasm on the outer surface of the left sheath at -720  
828 nm, and the right sheath at + 760 nm. Yellow arrowhead represents approximate  
829 position of the bridge as in C.

Figure 7

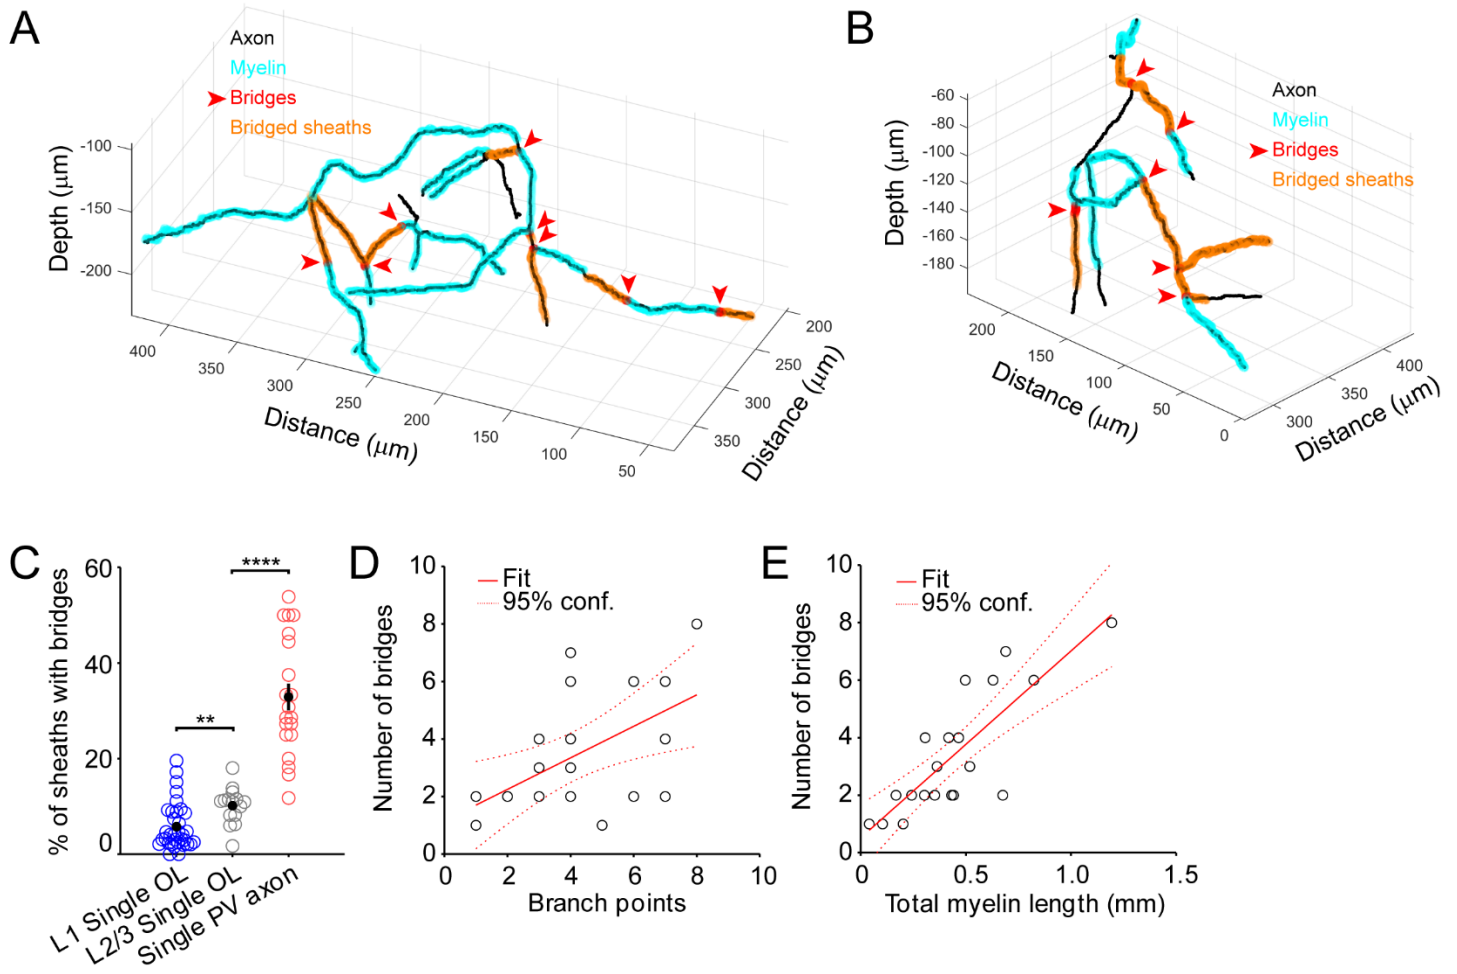

830 **Figure 7. Paranodal bridges are overrepresented on PV axons and frequently span**  
831 **branch points.**

832 (A-B) 3D reconstructions of PV axons imaged *in vivo* in *PV-Cre; Ai9; Mobp-EGFP*  
833 somatosensory cortex. Depth is relative to pia.

834 (C) Individual PV axons have significantly higher proportions of bridged sheaths than are  
835 generated by individual oligodendrocytes ( $p = 1.2 \times 10^{-15}$ , two-sample two-tailed t-test).

836 (D) The number of paranodal bridges per PV axon positively correlates with the number of  
837 branch points of the axon ( $R^2 = 0.31$ ,  $p = 0.017$ ).

838 (E) The number of paranodal bridges per PV axon positively correlates with the total myelin  
839 coverage of the axon ( $R^2 = 0.67$ ,  $p = 1.1 \times 10^{-5}$ ).

Figure 8

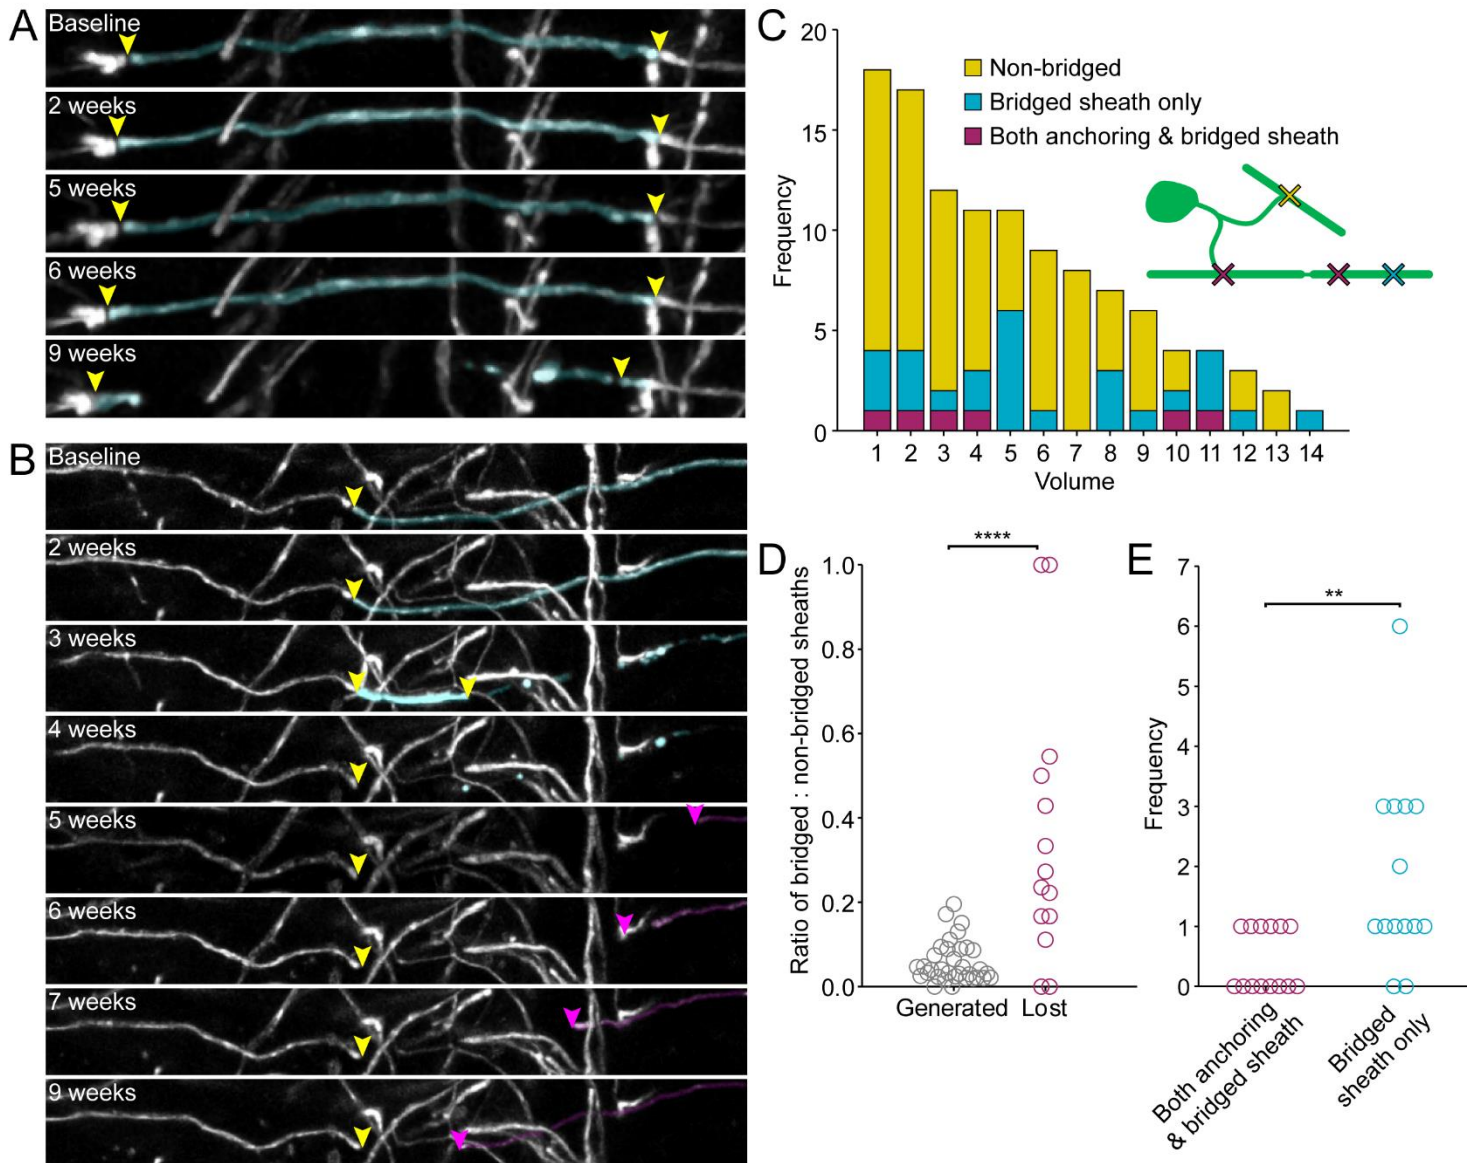



840 **Figure 8. Sheaths connected by paranodal bridge are vulnerable to degeneration in old**  
841 **age.**

- 842 (A) Example of a bridged sheath (highlighted cyan) that degenerates in the aged *Mobp-*  
843 *EGFP* mouse cortex over the course of nine weeks of imaging. Yellow arrowheads mark  
844 nodes of Ranvier. Note that there is no cytoplasmic process connected to the highlighted  
845 sheath.
- 846 (B) Another example of a degenerating bridged sheath (cyan). Note that at three weeks, the  
847 right part of the sheath has degenerated, but the left part still connected by bridge to its  
848 neighboring sheath seems to partially stabilize before completely degenerating at four  
849 weeks. Following clearance of the bridged sheath, the neighbor on the right (magenta)  
850 overtakes the original position of the bridged sheath and has nearly reformed the left  
851 node by nine weeks. Arrowheads mark locations of paranodes.
- 852 (C) Histogram of the identity of degenerating sheaths in each quadrant. Inset schematizes  
853 each category (yellow, non-bridged; cyan, only the bridged sheath is lost; magenta, both  
854 the anchoring sheath and its bridged sheath are lost).
- 855 (D) Plot comparing the ratios of bridged:non-bridged sheaths of those generated in early life  
856 (pooled data from baseline and control cells from Figure 3B) and those lost in the aged  
857 brain. \*\*\*\*  $p = 2.1 \times 10^{-4}$ , Kruskal-Wallis.
- 858 (E) Frequency plot of data in C, only comparing sheaths within a bridged pair (cyan and  
859 magenta) \*\*  $p = 0.002$ , signed rank test.

## 860 SUPPLEMENTAL FIGURES

### Supplemental Figure 1

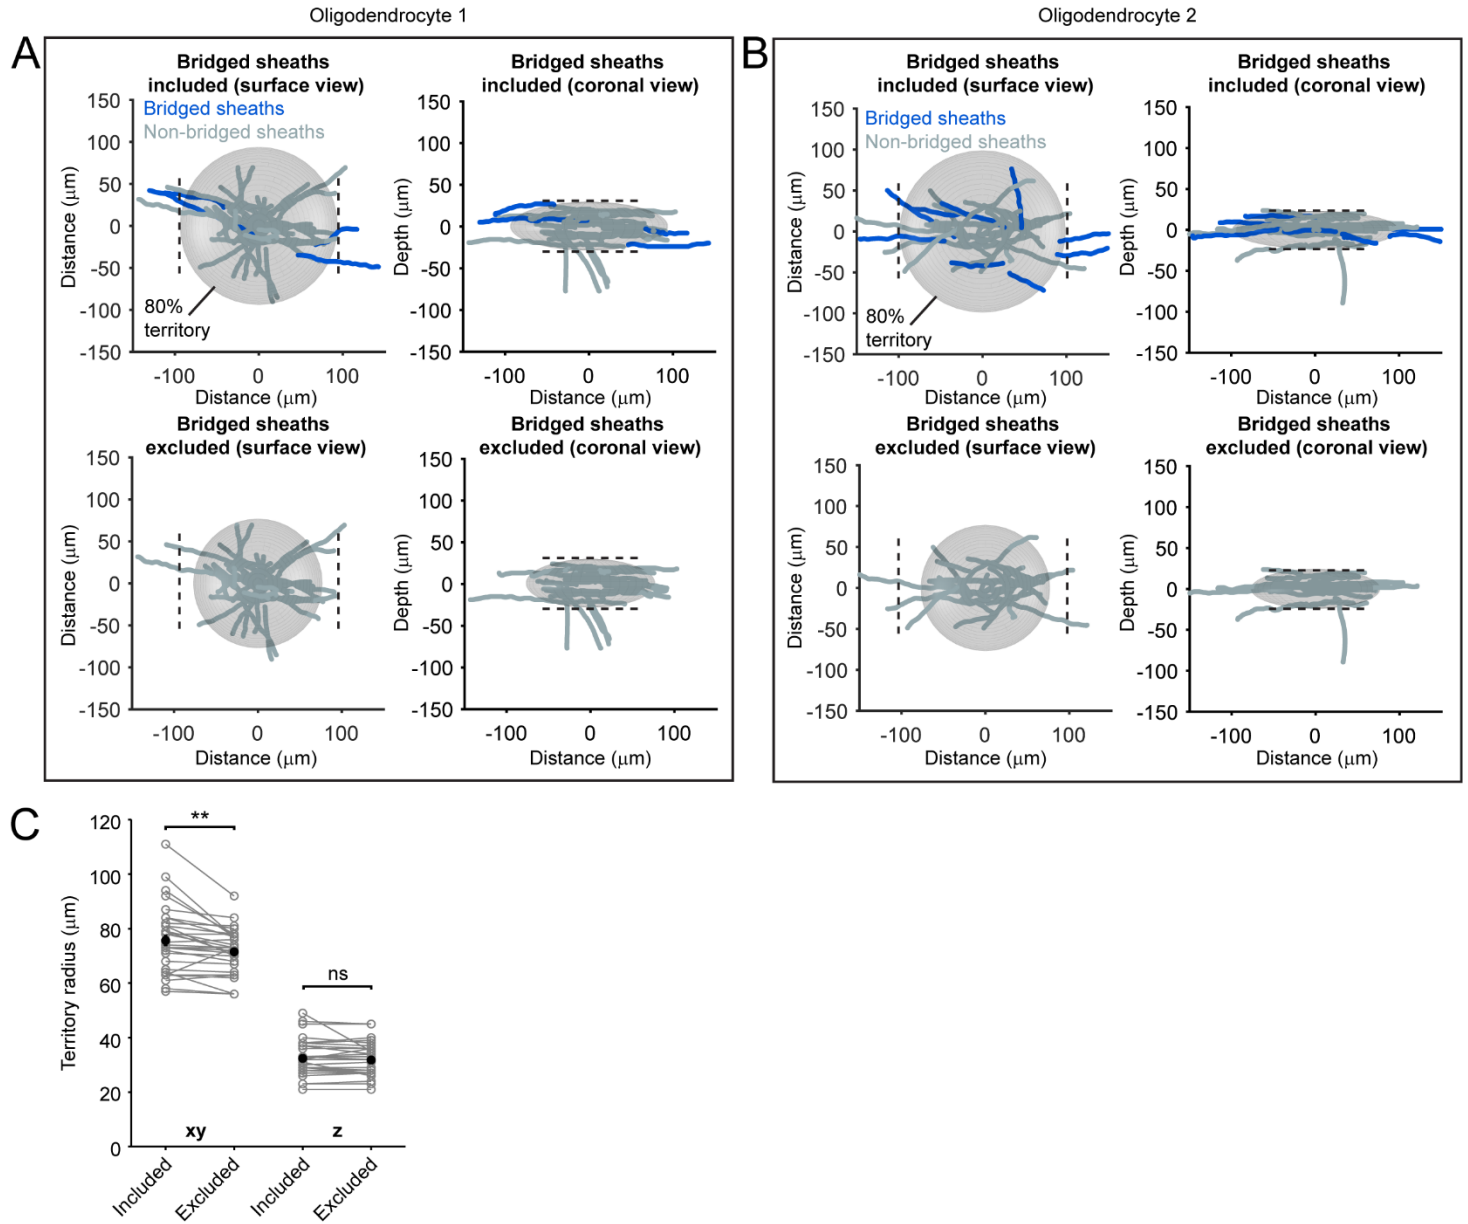

861 **Supplemental Figure 1. Bridged sheaths expand oligodendrocyte territory.**

862 (A-B) Sets of sheath cohort reconstructions from two oligodendrocytes. The top plots show all  
863 sheaths including bridged sheaths (highlighted dark blue) as viewed from the brain surface (left)  
864 and coronally (right). Best-fit territory ellipsoids encompassing  $\geq 80\%$  of total sheath content are  
865 superimposed. Bottom plots show only unbridged and anchoring sheaths of the same cell and  
866 the superimposed territory. Dotted lines indicate the diameter of territories with bridged sheaths  
867 included and are in the same relative positions in the top and bottom rows.

868 (C) Quantification for best-fit territory radii in xy and z dimensions for all existing and control  
869 oligodendrocytes used in Figure 3. The xy ( $p = 0.002$ , paired two-tailed t-test with Bonferroni  
870 correction), but not z ( $p = 0.46$ , paired two-tailed t-test with Bonferroni correction) radii are  
871 significantly smaller when bridged sheaths are excluded.

Supplemental Figure 2

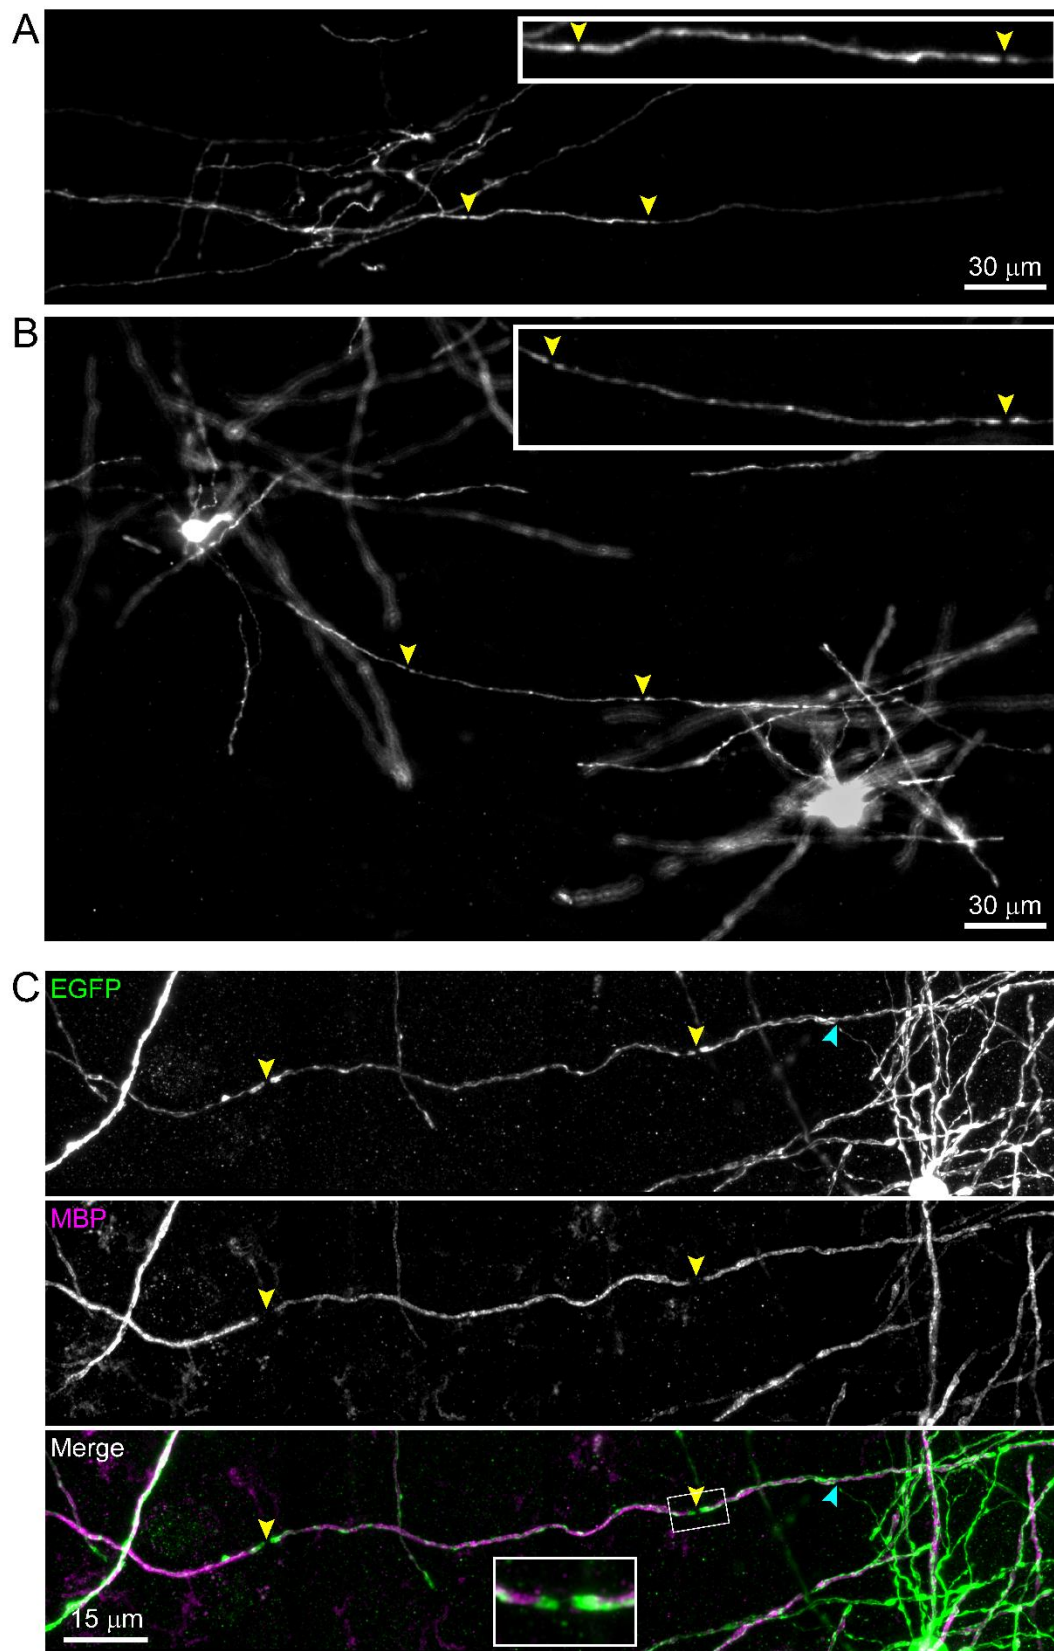

872 **Supplemental Figure 2. Paranodal bridges allow continuous myelination of select axons**  
873 **in sparsely myelinated regions.**

- 874 (A) Epifluorescence image of a partial cohort of sheaths from an oligodendrocyte (cell body  
875 not in section) in an *Mobp-EGFP* cortical flatmount in the temporal association area. A  
876 series of sheaths provide continuous myelination to one axon, and two paranodal  
877 bridges (yellow arrowheads) link three sequential sheaths from a single oligodendrocyte.
- 878 (B) As in *A*. This example shows two oligodendrocytes which share a single axon. The axon  
879 is continuously myelinated in between these cells, which would otherwise require a third  
880 oligodendrocyte if it were not for a bridged sheath provided by one of these cells.
- 881 (C) Similar to *A* and *B*, but a high resolution confocal z projection showing a continuously  
882 myelinated axon with one bridged sheath in the center. MBP immunostaining  
883 (center/magenta) shows two clear breaks along this axon, which are associated with  
884 nodes of Ranvier (yellow arrowheads), visible by the EGFP-positive doublets in the top  
885 panel. The inset in the bottom panel shows a magnified image of the node with a  
886 paranodal bridge. The blue arrowhead indicates the intersection between the  
887 cytoplasmic process and the anchoring sheath. \*\*\*\* $p = 1.87E-4$ , two-sample  
888 Kolmogorov-Smirnov Test.

### Supplemental Figure 3

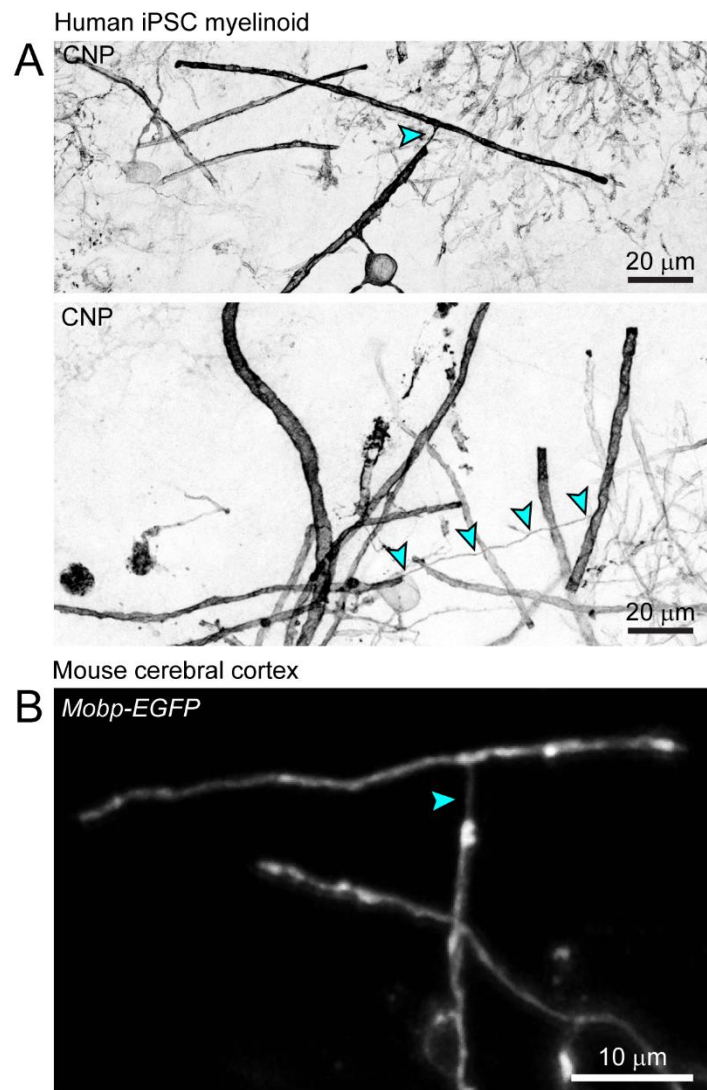

889 **Supplemental Figure 3: Unusual paranodal bridges.**

890 (A) Examples of atypical bridges connecting a paranode to an internode on different axons  
891 in human myelinoids.

892 (B) Example of an atypical paranode-internode bridge in the mouse cerebral cortex.

Supplemental Figure 4

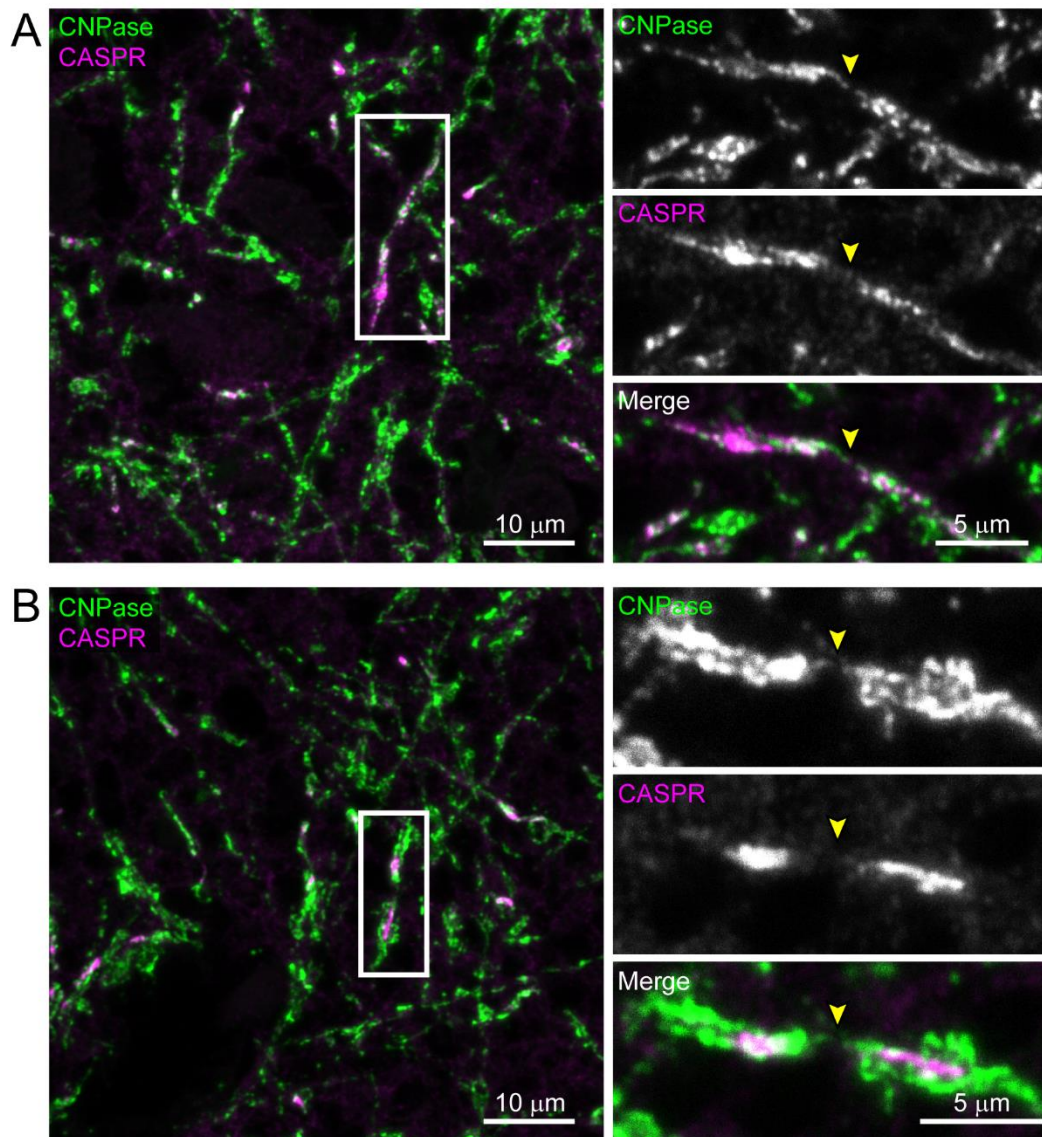



900 **Supplemental Figure 4: Paranodal bridges in human postmortem cerebral cortex.**

901 (A-B) Representative images of paranodal bridges in layer II/III of human post mortem motor  
902 cortex immunostained for CNPase and CASPR. Boxed region is magnified in separated channel  
903 images on the right. Arrowheads indicate CNPase-positive bridges spanning CASPR-positive  
904 paranodes.

Supplemental Figure 5

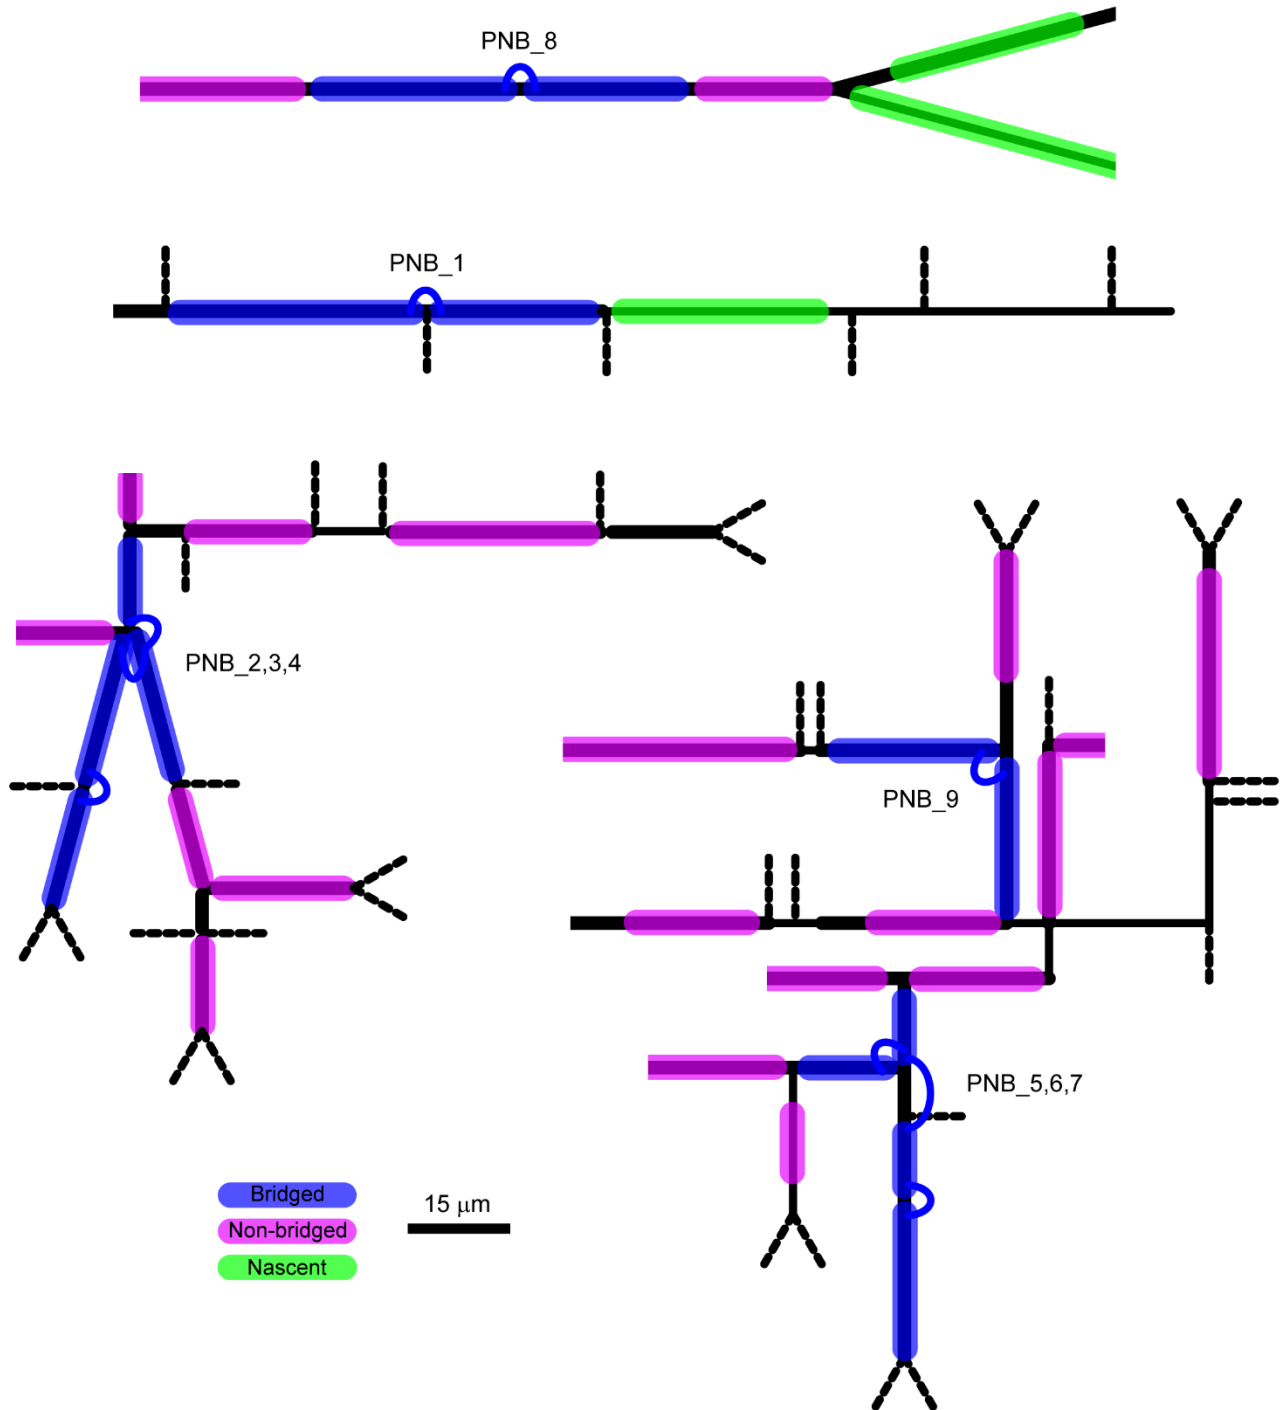

905 **Supplemental Figure 5. Skeletons of axonal morphologies myelinated by bridged**  
906 **sheaths.**

907 Skeletonized morphologies of four axons (black) with paranodal bridges in the EM dataset  
908 (Dorkenwald et al., 2019). Blue sheaths are those connected *via* paranodal bridges (connecting  
909 blue loops). Magenta sheaths are mature myelin sheaths without bridges with a direct  
910 cytoplasmic process. Green sheaths are non-compacted myelin sheaths presumably formed by  
911 recently differentiated oligodendrocytes. Axon segment lengths are scaled relative to the scale  
912 bar. Axon line thicknesses represent relative differences in diameter, but are not to scale.  
913 Dotted axon segments are very thin branches lined with synaptic terminals (full lengths not  
914 shown).

Supplemental Figure 6

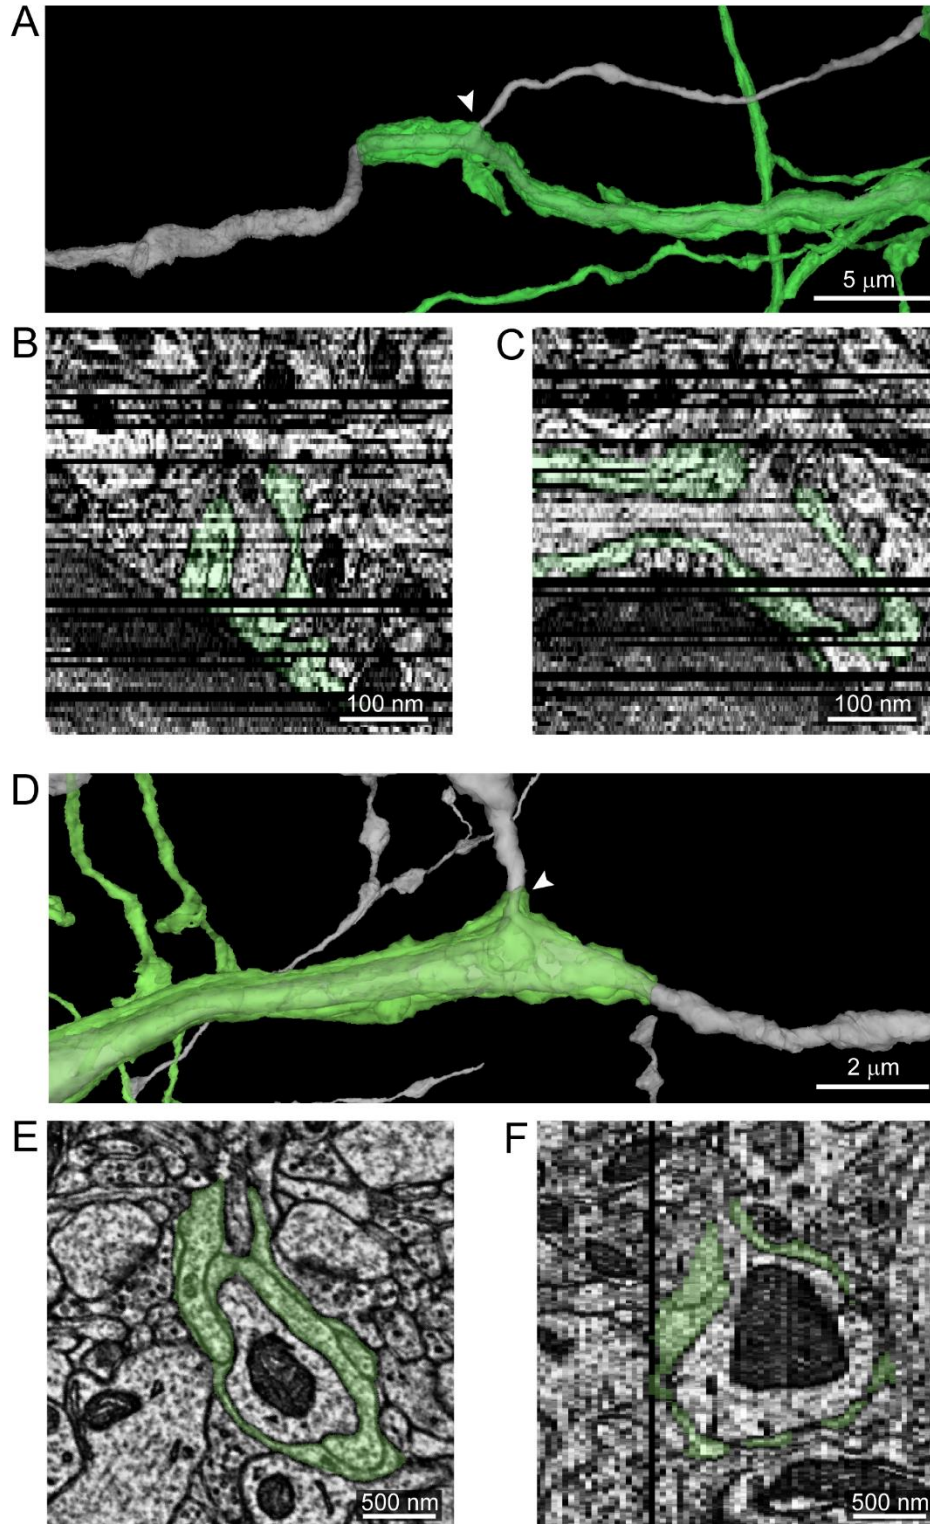

916 **Supplemental Figure 6. Nascent sheaths wrap axons across branch points prior to**  
917 **compaction.**

- 918 (A) Reconstructions of an axon (gray) and the processes of an immature oligodendrocyte  
919 that has generated sheaths, but none of them are compacted. One such nascent sheath  
920 wraps the axon past a branch point (arrowhead). Data from (Dorkenwald et al., 2019)  
921 and reconstructed with Neuroglancer (<https://neuroglancer-demo.appspot.com/>).
- 922 (B) XZ view of the position indicated by the arrowhead in *A*. Z slice depth 40 nm for *B* and *C*.  
923 Black lines are missing frames.
- 924 (C) YZ view of the position indicated by the arrowhead in *A*.
- 925 (D) Second example of a nascent sheath (green) crossing the branch point (arrowhead) of  
926 an axon (gray).
- 927 (E) XY view near the position indicated by the arrowhead in *D*.
- 928 (F) YZ view at the branch point of the axon in *D*.

Supplemental Figure 7

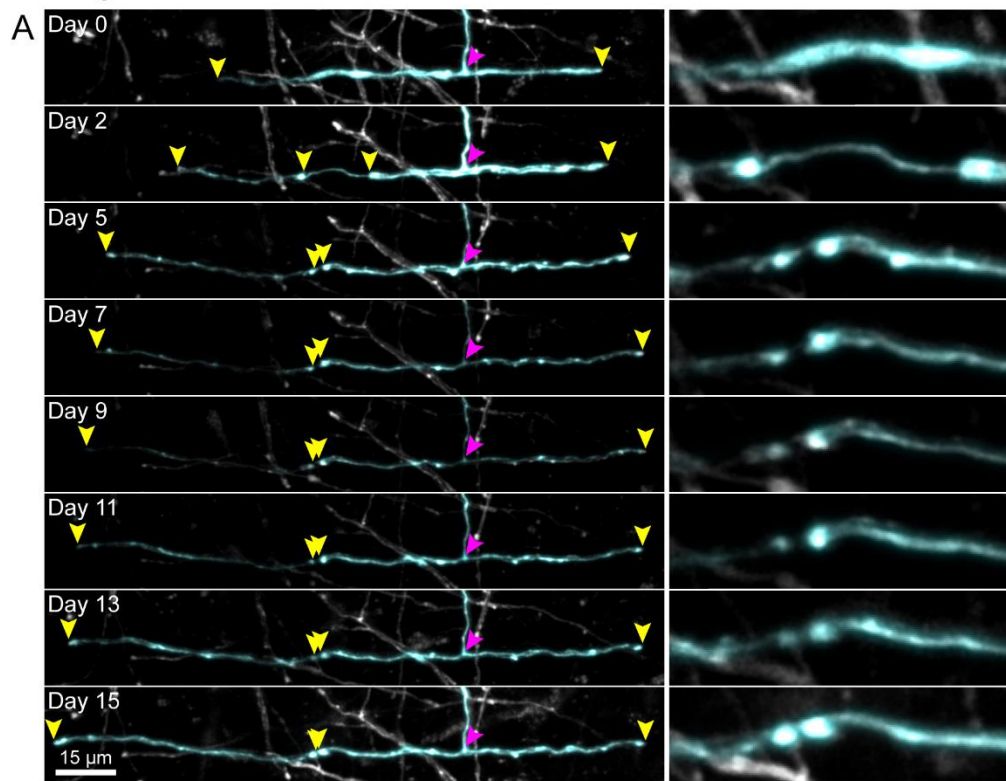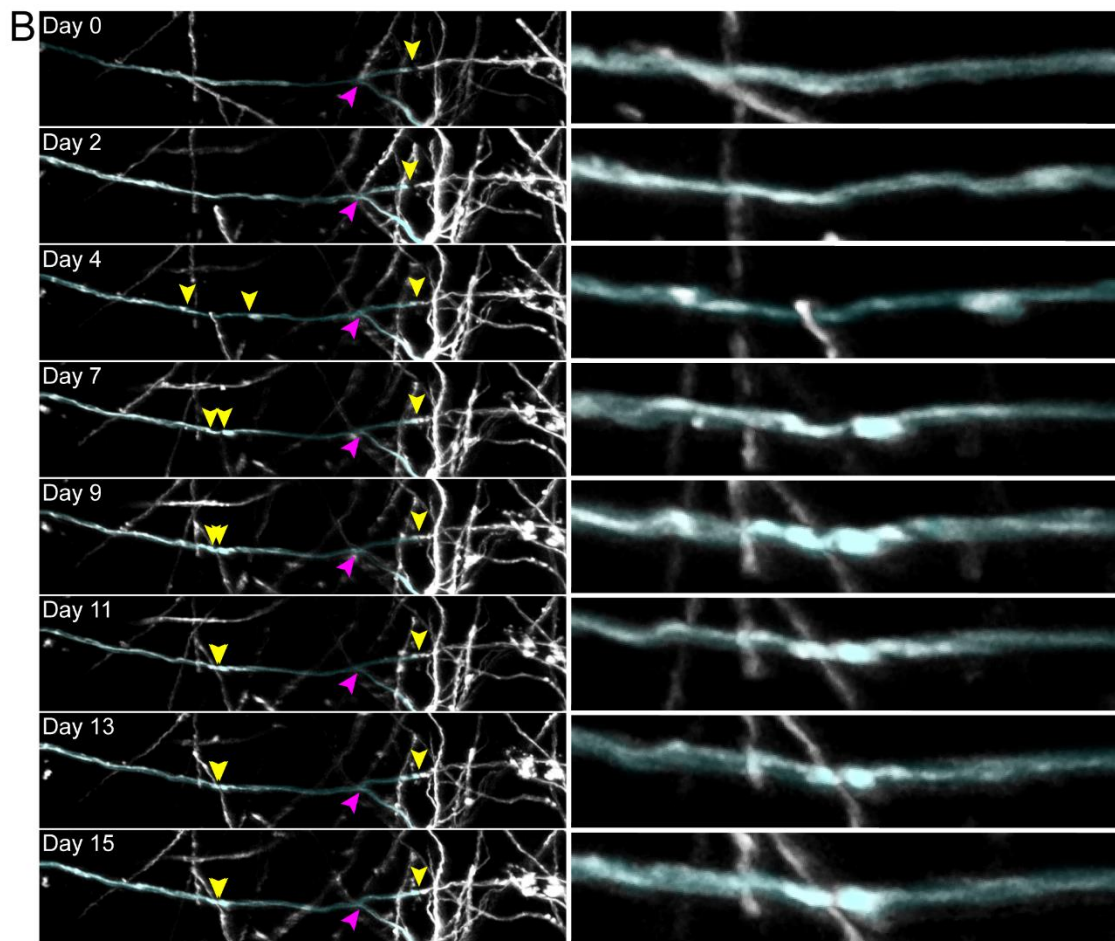

929 **Supplemental Figure 7. Individual nascent sheaths split, forming two sheaths connected**  
930 **by paranodal bridge across a node of Ranvier.**

931 (A) Time course of the formation of a mouse cortical paranodal bridge *in vivo*. At day 0, the  
932 oligodendrocyte has first appeared, and the highlighted sheath appears to begin as a  
933 single sheath. The magenta arrowhead indicates the intersection of the cell's  
934 cytoplasmic process with this nascent sheath, and yellow arrowheads indicate the ends  
935 of this sheath. By day 2, the center of the sheath is thinned, and a thin strand of  
936 cytoplasm connects two bright puncta, which eventually form a doublet characteristic of  
937 paranodes flanking a node of Ranvier, as the paranodes move towards each other over  
938 the course of 15 days. The right column of images shows a magnified view of the  
939 forming paranodal bridge for the respective timepoint on the left.

940 (B) Time course of the formation of a second paranodal bridge *in vivo*.

Supplemental Figure 8

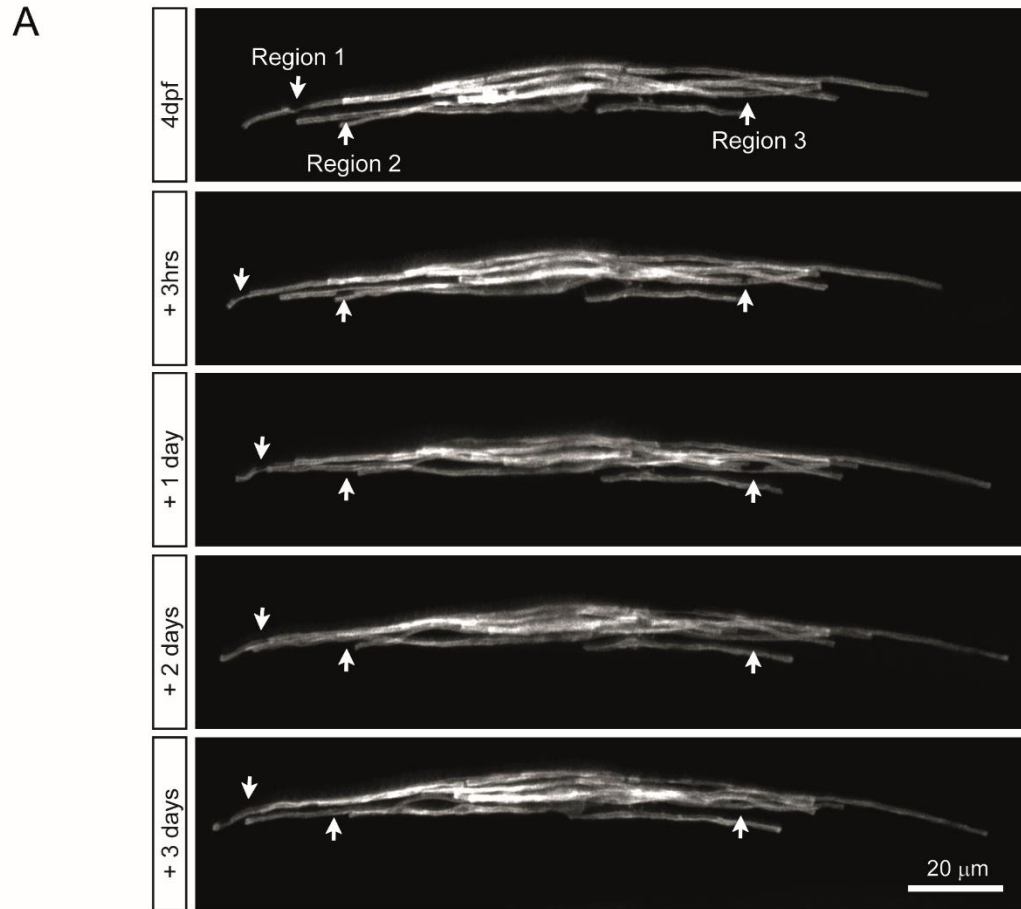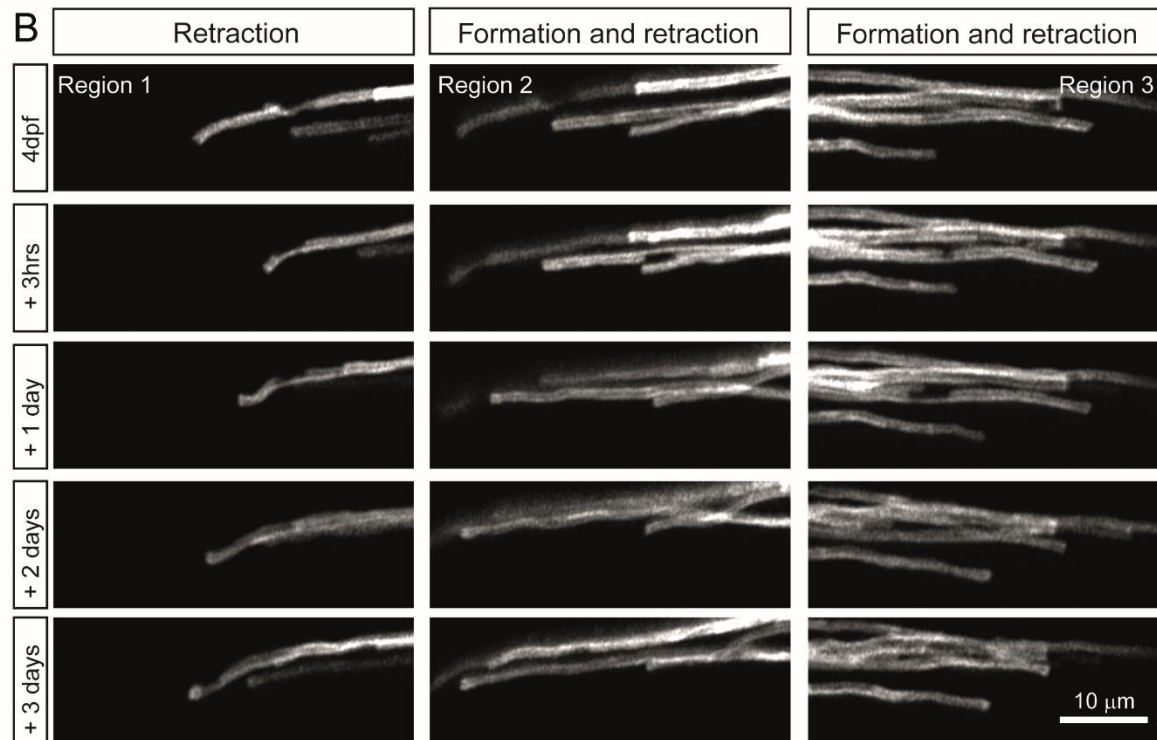



942 **Supplemental Figure 8. Dynamic paranodal bridges form by sheath splitting in the**  
943 **zebrafish spinal cord.**

944 (A) Time course of a single oligodendrocyte and its myelin sheaths (fluorescently labelled by  
945 mosaic expression of *mbp:EGFP-CAAX*) imaged between 4 and 7 dpf. Region 1, 2 and  
946 3 show the locations where paranodal bridges form.

947 (B) Zoomed panels of regions 1, 2 and 3. Region 1 shows a myelin sheath which is present  
948 at 4 dpf but retracts by 7 dpf. Region 2 shows a myelin bridge forming between 4 dpf  
949 and + 3hrs which is no longer present by +1 day. Region 3 shows a myelin bridge  
950 forming between 4 dpf and + 3 hrs which is no longer present by +1 day.

951

952 **SUPPLEMENTAL MOVIES**

953 **Supplemental Movie 1. Volumetric EM of paranodal bridge across an axon branch point.**

954 Continuous cytoplasm within outer tongues of two bridged sheaths highlighted magenta.

955 Arrowheads track continuation of outer tongue cytoplasm across the paranodal bridge. Other  
956 paranodal loops are highlighted in cyan. Movie scrolls down through z stack before reversing  
957 back to top.

## 958 REFERENCES

- 959 Aboul-Enein F, Rauschka H, Kornek B, Stadelmann C, Stefferl A, Brück W, Lucchinetti C,  
960 Schmidbauer M, Jellinger K, Lassmann H. 2003. Preferential Loss of Myelin-Associated  
961 Glycoprotein Reflects Hypoxia-Like White Matter Damage in Stroke and Inflammatory  
962 Brain Diseases. *J Neuropathol Exp Neurol* **62**:25–33. doi:10.1093/jnen/62.1.25
- 963 Almeida RG, Czopka T, French-Constant C, Lyons DA. 2011. Individual axons regulate the  
964 myelinating potential of single oligodendrocytes in vivo. *Development* **138**:4443–4450.  
965 doi:10.1242/dev.071001
- 966 Almeida RG, Pan S, Cole KLH, Williamson JM, Early JJ, Czopka T, Klingseisen A, Chan JR,  
967 Lyons DA. 2018. Myelination of Neuronal Cell Bodies when Myelin Supply Exceeds Axonal  
968 Demand. *Curr Biol* **28**:1296-1305.e5. doi:10.1016/j.cub.2018.02.068
- 969 Auer F, Vagionitis S, Czopka T. 2018. Evidence for Myelin Sheath Remodeling in the CNS  
970 Revealed by In Vivo Imaging. *Curr Biol* **28**:549-559.e3. doi:10.1016/j.cub.2018.01.017
- 971 Bacmeister CM, Barr HJ, McClain CR, Thornton MA, Nettles D, Welle CG, Hughes EG. 2020.  
972 Motor learning promotes remyelination via new and surviving oligodendrocytes. *Nat*  
973 *Neurosci* **23**:819–831. doi:10.1038/s41593-020-0637-3
- 974 Bechler ME, Byrne L, French-Constant C. 2015. CNS Myelin Sheath Lengths Are an Intrinsic  
975 Property of Oligodendrocytes. *Curr Biol* **25**:2411–2416. doi:10.1016/j.cub.2015.07.056
- 976 Benveniste H, Liu X, Koundal S, Sanggaard S, Lee H, Wardlaw J. 2019. The Glymphatic  
977 System and Waste Clearance with Brain Aging: A Review. *Gerontology* **65**:106–119.  
978 doi:10.1159/000490349
- 979 Boullerne AI. 2016. The history of myelin. *Exp Neurol* **283**:431–445.  
980 doi:10.1016/j.expneurol.2016.06.005
- 981 Buchanan J, Elabbady L, Collman F, Jorstad NL, Bakken TE, Ott C, Glatzer J, Bleckert AA,  
982 Bodor AL, Brittan D, Bumbarger DJ, Mahalingam G, Seshamani S, Schneider-Mizell C,  
983 Takeno MM, Torres R, Yin W, Hodge RD, Castro M, Dorkenwald S, Ih D, Jordan CS,  
984 Kemnitz N, Lee K, Lu R, Macrina T, Mu S, Popovych S, Silversmith WM, Tartavull I, Turner  
985 NL, Wilson AM, Wong W, Wu J, Zlateski A, Zung J, Lippincott-Schwartz J, Lein ES, Seung  
986 HS, Bergles DE, Reid RC, Costa NM da. 2021. Oligodendrocyte precursor cells prune  
987 axons in the mouse neocortex. *bioRxiv* 2021.05.29.446047.  
988 doi:10.1101/2021.05.29.446047
- 989 Butt AM, Ransom BR. 1993. Morphology of astrocytes and oligodendrocytes during  
990 development in the intact rat optic nerve. *J Comp Neurol* **338**:141–158.  
991 doi:10.1002/cne.903380110
- 992 Cai J, Qi Y, Hu X, Tan M, Liu Z, Zhang J, Li Q, Sander M, Qiu M. 2005. Generation of  
993 Oligodendrocyte Precursor Cells from Mouse Dorsal Spinal Cord Independent of Nkx6  
994 Regulation and Shh Signaling. *Neuron* **45**:41–53. doi:10.1016/j.neuron.2004.12.028
- 995 Call CL, Bergles DE. 2021. Cortical neurons exhibit diverse myelination patterns that scale  
996 between mouse brain regions and regenerate after demyelination. *Nat Commun* **12**:4767.  
997 doi:10.1038/s41467-021-25035-2

- 998 Camandola S, Mattson MP. 2017. Brain metabolism in health, aging, and neurodegeneration.  
999 *EMBO J* **36**:1474–1492. doi:10.15252/embj.201695810
- 1000 Cardin JA, Carlén M, Meletis K, Knoblich U, Zhang F, Deisseroth K, Tsai L-H, Moore CI. 2009.  
1001 Driving fast-spiking cells induces gamma rhythm and controls sensory responses. *Nature*  
1002 **459**:663–667. doi:10.1038/nature08002
- 1003 Chong SYC, Rosenberg SS, Fancy SPJ, Zhao C, Shen Y-AA, Hahn AT, McGee AW, Xu X,  
1004 Zheng B, Zhang LI, Rowitch DH, Franklin RJM, Lu QR, Chan JR. 2012. Neurite outgrowth  
1005 inhibitor Nogo-A establishes spatial segregation and extent of oligodendrocyte myelination.  
1006 *Proc Natl Acad Sci* **109**:1299–1304. doi:10.1073/pnas.1113540109
- 1007 Cobb SR, Buhl EH, Halasy K, Paulsen O, Somogyi P. 1995. Synchronization of neuronal activity  
1008 in hippocampus by individual GABAergic interneurons. *Nature* **378**:75–78.  
1009 doi:10.1038/378075a0
- 1010 Coleman M. 2005. Axon degeneration mechanisms: Commonality amid diversity. *Nat Rev*  
1011 *Neurosci*. doi:10.1038/nrn1788
- 1012 Czopka T, French-Constant C, Lyons DA. 2013. Individual Oligodendrocytes Have Only a Few  
1013 Hours in which to Generate New Myelin Sheaths In Vivo. *Dev Cell* **25**:599–609.  
1014 doi:10.1016/j.devcel.2013.05.013
- 1015 del Rio Hortega P. 1922. ¿Son homologables la glia de escasas radiaciones y la célula de  
1016 schwann? *Boletín la Soc española Biol* **10**:25–28.
- 1017 Dorkenwald S, Turner N, Macrina T, Lee K, Lu R, Wu J, Bodor A, Bleckert A, Brittain D, Kernitz  
1018 N, Silversmith W, Ih D, Zung J, Zlateski A, Tartavull I, Yu S-C, Popovych S, Wong W,  
1019 Castro M, Jordan C, Wilson A, Froudarakis E, Buchanan J, Takeno M, Torres R,  
1020 Mahalingam G, Collman F, Schneider-Mizell C, Bumbarger D, Li Y, Becker L, Suckow S,  
1021 Reimer J, Tolias A, da Costa NM, Reid RC, Seung HS. 2019. Binary and analog variation  
1022 of synapses between cortical pyramidal neurons. *bioRxiv* 2019.12.29.890319.  
1023 doi:10.1101/2019.12.29.890319
- 1024 Fogarty M, Richardson WD, Kessaris N. 2005. A subset of oligodendrocytes generated from  
1025 radial glia in the dorsal spinal cord. *Development* **132**:1951–1959. doi:10.1242/dev.01777
- 1026 Geren B Ben. 1954. The formation from the schwann cell surface of myelin in the peripheral  
1027 nerves of chick embryos. *Exp Cell Res* **7**:558–562. doi:10.1016/S0014-4827(54)80098-X
- 1028 Grossman Y, Parnas I, Spira ME. 1979a. Differential conduction block in branches of a  
1029 bifurcating axon. *J Physiol* **295**:283–305. doi:10.1113/JPHYSIOL.1979.SP012969
- 1030 Grossman Y, Parnas I, Spira ME. 1979b. Mechanisms involved in differential conduction of  
1031 potentials at high frequency in a branching axon. *J Physiol* **295**:307–322.  
1032 doi:10.1113/jphysiol.1979.sp012970
- 1033 Haber M, Vautrin S, Fry EJ, Murai KK. 2009. Subtype-specific oligodendrocyte dynamics in  
1034 organotypic culture. *Glia* **57**:1000–1013. doi:10.1002/glia.20824
- 1035 Hagemeyer N, Goebbels S, Papiol S, Kästner A, Hofer S, Begemann M, Gerwig UC, Boretius S,  
1036 Wieser GL, Ronnenberg A, Gurchich A, Heckers SH, Frahm J, Nave KA, Ehrenreich H.

- 1037 2012. A myelin gene causative of a catatonia-depression syndrome upon aging. *EMBO*  
1038 *Mol Med* **4**:528–539. doi:10.1002/emmm.201200230
- 1039 Hamada MS, Kole MHP. 2015. Myelin Loss and Axonal Ion Channel Adaptations Associated  
1040 with Gray Matter Neuronal Hyperexcitability. *J Neurosci* **35**:7272–7286.  
1041 doi:10.1523/JNEUROSCI.4747-14.2015
- 1042 Hardy RJ, Friedrich VL. 1996. Progressive remodeling of the oligodendrocyte process arbor  
1043 during myelinogenesis. *Dev Neurosci* **18**:243–254. doi:10.1159/000111414
- 1044 Harris JJ, Attwell D. 2012. The Energetics of CNS White Matter. *J Neurosci* **32**:356–371.  
1045 doi:10.1523/JNEUROSCI.3430-11.2012
- 1046 Hill RA, Li AM, Grutzendler J. 2018. Lifelong cortical myelin plasticity and age-related  
1047 degeneration in the live mammalian brain. *Nat Neurosci* **21**:683–695. doi:10.1038/s41593-  
1048 018-0120-6
- 1049 Hughes AN, Appel B. 2020. Microglia phagocytose myelin sheaths to modify developmental  
1050 myelination. *Nat Neurosci*. doi:10.1038/s41593-020-0654-2
- 1051 Hughes EG, Kang SH, Fukaya M, Bergles DE. 2013. Oligodendrocyte progenitors balance  
1052 growth with self-repulsion to achieve homeostasis in the adult brain. *Nat Neurosci* **16**:668–  
1053 676. doi:10.1038/nn.3390
- 1054 Hughes EG, Orthmann-Murphy JL, Langseth AJ, Bergles DE. 2018. Myelin remodeling through  
1055 experience-dependent oligodendrogenesis in the adult somatosensory cortex. *Nat*  
1056 *Neurosci* **21**:696–706. doi:10.1038/s41593-018-0121-5
- 1057 Ioannidou K, Anderson KI, Strachan D, Edgar JM, Barnett SC. 2012. Time-lapse imaging of the  
1058 dynamics of CNS glial-axonal interactions in vitro and ex vivo. *PLoS One* **7**.  
1059 doi:10.1371/journal.pone.0030775
- 1060 James OG, Selvaraj BT, Magnani D, Burr K, Connick P, Barton SK, Vasistha NA, Hampton DW,  
1061 Story D, Smigiel R, Ploski R, Brophy PJ, Ffrench-Constant C, Lyons DA, Chandran S.  
1062 2021. iPSC-derived myelinoids to study myelin biology of humans. *Dev Cell* **56**:1346-  
1063 1358.e6. doi:10.1016/j.devcel.2021.04.006
- 1064 Kessaris N, Fogarty M, Iannarelli P, Grist M, Wegner M, Richardson WD. 2006. Competing  
1065 waves of oligodendrocytes in the forebrain and postnatal elimination of an embryonic  
1066 lineage. *Nat Neurosci* **9**:173–179. doi:10.1038/nn1620
- 1067 Kirby BB, Takada N, Latimer AJ, Shin J, Carney TJ, Kelsh RN, Appel B. 2006. In vivo time-  
1068 lapse imaging shows dynamic oligodendrocyte progenitor behavior during zebrafish  
1069 development. *Nat Neurosci* **9**:1506–1511. doi:10.1038/nn1803
- 1070 Klausberger T, Márton LF, Baude A, Roberts JDB, Magill PJ, Somogyi P. 2004. Spike timing of  
1071 dendrite-targeting bistratified cells during hippocampal network oscillations in vivo. *Nat*  
1072 *Neurosci* **7**:41–47. doi:10.1038/nn1159
- 1073 Koudelka S, Voas MG, Almeida RG, Baraban M, Soetaert J, Meyer MP, Talbot WS, Lyons DA.  
1074 2016. Individual Neuronal Subtypes Exhibit Diversity in CNS Myelination Mediated by  
1075 Synaptic Vesicle Release. *Curr Biol* **26**:1447–1455. doi:10.1016/j.cub.2016.03.070

- 1076 Lang EJ, Rosenbluth J. 2003. Role of myelination in the development of a uniform  
1077 olivocerebellar conduction time. *J Neurophysiol* **89**:2259–70. doi:10.1152/jn.00922.2002
- 1078 Lappe-Siefke C, Goebbels S, Gravel M, Nicksch E, Lee J, Braun PE, Griffiths IR, Nave K-A.  
1079 2003. Disruption of *Cnp1* uncouples oligodendroglial functions in axonal support and  
1080 myelination. doi:10.1038/ng1095
- 1081 Larson VA, Mironova Y, Vanderpool KG, Waisman A, Rash JE, Agarwal A, Bergles DE. 2018.  
1082 Oligodendrocytes control potassium accumulation in white matter and seizure  
1083 susceptibility. *Elife* **7**:1–33. doi:10.7554/eLife.34829
- 1084 Lee Y, Morrison BM, Li Y, Lengacher S, Farah MH, Hoffman PN, Liu Y, Tsingalia A, Jin L,  
1085 Zhang PW, Pellerin L, Magistretti PJ, Rothstein JD. 2012. Oligodendroglia metabolically  
1086 support axons and contribute to neurodegeneration. *Nature* **487**:443–448.  
1087 doi:10.1038/nature11314
- 1088 Manor Y, Koch C, Segev I. 1991. Effect of geometrical irregularities on propagation delay in  
1089 axonal trees. *Biophys J* **60**:1424–1437. doi:10.1016/S0006-3495(91)82179-8
- 1090 Marisca R, Hoche T, Agirre E, Hoodless LJ, Barkey W, Auer F, Castelo-Branco G, Czopka T.  
1091 2020. Functionally distinct subgroups of oligodendrocyte precursor cells integrate neural  
1092 activity and execute myelin formation. *Nat Neurosci* **23**:363–374. doi:10.1038/s41593-019-  
1093 0581-2
- 1094 Mattson MP, Arumugam T V. 2018. Hallmarks of Brain Aging: Adaptive and Pathological  
1095 Modification by Metabolic States. *Cell Metab* **27**:1176–1199.  
1096 doi:10.1016/J.CMET.2018.05.011
- 1097 Mayoral SR, Etxeberria A, Shen Y-AA, Chan JR. 2018. Initiation of CNS Myelination in the Optic  
1098 Nerve Is Dependent on Axon Caliber. *Cell Rep* **25**:544-550.e3.  
1099 doi:10.1016/j.celrep.2018.09.052
- 1100 Micheva KD, Kiraly M, Perez MM, Madison D V. 2021. Conduction Velocity Along the Local  
1101 Axons of Parvalbumin Interneurons Correlates With the Degree of Axonal Myelination.  
1102 *Cereb Cortex* **31**:3374–3392. doi:10.1093/CERCOR/BHAB018
- 1103 Micheva KD, Wolman D, Mensh BD, Pax E, Buchanan J, Smith SJ, Bock DD. 2016. A large  
1104 fraction of neocortical myelin ensheathes axons of local inhibitory neurons. *Elife* **5**:1–29.  
1105 doi:10.7554/eLife.15784
- 1106 Morrison BM, Tsingalia A, Vidensky S, Lee Y, Jin L, Farah MH, Lengacher S, Magistretti PJ,  
1107 Pellerin L, Rothstein JD. 2015. Deficiency in monocarboxylate transporter 1 (MCT1) in  
1108 mice delays regeneration of peripheral nerves following sciatic nerve crush. *Exp Neurol*  
1109 **263**:325–338. doi:10.1016/j.expneurol.2014.10.018
- 1110 Murtie JC, Macklin WB, Corfas G. 2007. Morphometric analysis of oligodendrocytes in the adult  
1111 mouse frontal cortex. *J Neurosci Res* **85**:2080–2086. doi:10.1002/jnr.21339
- 1112 Orthmann-Murphy J, Call CL, Molina-Castro GC, Hsieh YC, Rasband MN, Calabresi PA,  
1113 Bergles DE. 2020. Remyelination alters the pattern of myelin in the cerebral cortex. *Elife*  
1114 **9**:1–61. doi:10.7554/eLife.56621

- 1115 Pajevic S, Basser PJ, Fields RD. 2014. Role of myelin plasticity in oscillations and synchrony of  
1116 neuronal activity. *Neuroscience* **276**:135–147. doi:10.1016/j.neuroscience.2013.11.007
- 1117 Parnas I, Segev I. 1979. A mathematical model for conduction of action potentials along  
1118 bifurcating axons. *J Physiol* **295**:323–343. doi:10.1113/jphysiol.1979.sp012971
- 1119 Penfield W. 1924. Oligodendroglia and its relation to classical neuroglia. *Brain* **47**:430–452.  
1120 doi:10.1093/brain/47.4.430
- 1121 Philips T, Mironova YA, Jouroukhin Y, Chew J, Vidensky S, Farah MH, Pletnikov M V., Bergles  
1122 DE, Morrison BM, Rothstein JD. 2021. MCT1 Deletion in Oligodendrocyte Lineage Cells  
1123 Causes Late-Onset Hypomyelination and Axonal Degeneration. *Cell Rep* **34**.  
1124 doi:10.1016/j.celrep.2020.108610
- 1125 Portera-Cailliau C, Weimer RM, De Paola V, Caroni P, Svoboda K. 2005. Diverse modes of  
1126 axon elaboration in the developing neocortex. *PLoS Biol* **3**.  
1127 doi:10.1371/journal.pbio.0030272
- 1128 Ratnadurai-Giridharann S, Khargonekar PP, Talathi SS. 2015. Emergent gamma synchrony in  
1129 all-to-all interneuronal networks. *Front Comput Neurosci* **9**. doi:10.3389/fncom.2015.00127
- 1130 Rinholm JE, Hamilton NB, Kessaris N, Richardson WD, Bergersen LH, Attwell D. 2011.  
1131 Regulation of Oligodendrocyte Development and Myelination by Glucose and Lactate. *J*  
1132 *Neurosci* **31**:538–548. doi:10.1523/JNEUROSCI.3516-10.2011
- 1133 Saab AS, Nave KA. 2017. Myelin dynamics: protecting and shaping neuronal functions. *Curr*  
1134 *Opin Neurobiol* **47**:104–112. doi:10.1016/j.conb.2017.09.013
- 1135 Saab AS, Tzvetanova ID, Nave KA. 2013. The role of myelin and oligodendrocytes in axonal  
1136 energy metabolism. *Curr Opin Neurobiol* **23**:1065–1072. doi:10.1016/j.conb.2013.09.008
- 1137 Schirmer L, Möbius W, Zhao C, Cruz-Herranz A, Ben Haim L, Cordano C, Shioh LR, Kelley  
1138 KW, Sadowski B, Timmons G, Pröbstel AK, Wright JN, Sin JH, Devereux M, Morrison DE,  
1139 Chang SM, Sabeur K, Green AJ, Nave KA, Franklin RJM, Rowitch DH. 2018.  
1140 Oligodendrocyte-encoded kir4.1 function is required for axonal integrity. *Elife* **7**:1–21.  
1141 doi:10.7554/eLife.36428
- 1142 Schmitt FO, Bear RS, Clark GL. 1935. X-ray Diffraction Studies on Nerve. *Radiology* **25**:131–  
1143 151. doi:10.1148/25.2.131
- 1144 Segovia KN, McClure M, Moravec M, Luo NL, Wan Y, Gong X, Riddle A, Craig A, Struve J,  
1145 Sherman LS, Back SA. 2008. Arrested oligodendrocyte lineage maturation in chronic  
1146 perinatal white matter injury. *Ann Neurol* **63**:520–530. doi:10.1002/ana.21359
- 1147 Seidl AH, Rubel EW. 2016. Systematic and differential myelination of axon collaterals in the  
1148 mammalian auditory brainstem. *Glia* **64**:487–494. doi:10.1002/glia.22941
- 1149 Seidl AH, Rubel EW, Barria A. 2014. Differential Conduction Velocity Regulation in Ipsilateral  
1150 and Contralateral Collaterals Innervating Brainstem Coincidence Detector Neurons. *J*  
1151 *Neurosci* **34**:4914–4919. doi:10.1523/JNEUROSCI.5460-13.2014
- 1152 Snaidero N, Möbius W, Czopka T, Hekking LHPHP, Mathisen C, Verkleij D, Goebbels S, Edgar  
1153 J, Merkler D, Lyons DAA, Nave K-AA, Simons M. 2014. Myelin membrane wrapping of

- 1154 CNS axons by PI(3,4,5)P3-dependent polarized growth at the inner tongue. *Cell* **156**:277–  
1155 290. doi:10.1016/j.cell.2013.11.044
- 1156 Snaidero N, Velte C, Myllykoski M, Raasakka A, Ignatev A, Werner HB, Erwig MS, Möbius W,  
1157 Kursula P, Nave KA, Simons M. 2017. Antagonistic Functions of MBP and CNP Establish  
1158 Cytosolic Channels in CNS Myelin. *Cell Rep* **18**:314–323. doi:10.1016/j.celrep.2016.12.053
- 1159 Stedehouder J, Brizee D, Shpak G, Kushner SA. 2018. Activity-Dependent Myelination of  
1160 Parvalbumin Interneurons Mediated by Axonal Morphological Plasticity. *J Neurosci*  
1161 **38**:3631–3642. doi:10.1523/JNEUROSCI.0074-18.2018
- 1162 Stedehouder J, Brizee D, Slotman JA, Pascual-García M, Leyrer ML, Bouwen BLJ, Dirven CMF,  
1163 Gao Z, Berson DM, Houtsmuller AB, Kushner SA. 2019. Local axonal morphology guides  
1164 the topography of interneuron myelination in mouse and human neocortex. *Elife* **8**:1–28.  
1165 doi:10.7554/eLife.48615
- 1166 Stedehouder J, Couey JJ, Brizee D, Hosseini B, Slotman JA, Dirven CMFF, Shpak G,  
1167 Houtsmuller AB, Kushner SA. 2017. Fast-spiking Parvalbumin Interneurons are Frequently  
1168 Myelinated in the Cerebral Cortex of Mice and Humans. *Cereb Cortex* **27**:5001–5013.  
1169 doi:10.1093/cercor/bhx203
- 1170 Stedehouder J, Kushner SA. 2017. Myelination of parvalbumin interneurons: A parsimonious  
1171 locus of pathophysiological convergence in schizophrenia. *Mol Psychiatry* **22**:4–12.  
1172 doi:10.1038/mp.2016.147
- 1173 Toth E, Rassul SM, Berry M, Fulton D. 2021. A morphological analysis of activity-dependent  
1174 myelination and myelin injury in transitional oligodendrocytes. *Sci Rep* **11**.  
1175 doi:10.1038/s41598-021-88887-0
- 1176 Tripathi RB, Jackiewicz M, McKenzie IA, Kougioumtzidou E, Grist M, Richardson WD. 2017.  
1177 Remarkable Stability of Myelinating Oligodendrocytes in Mice. *Cell Rep* **21**:316–323.  
1178 doi:10.1016/j.celrep.2017.09.050
- 1179 Uzor N-E, McCullough LD, Tsvetkov AS. 2020. Peroxisomal Dysfunction in Neurological  
1180 Diseases and Brain Aging. *Front Cell Neurosci* **14**:44. doi:10.3389/fncel.2020.00044
- 1181 Vallstedt A, Klos JM, Ericson J. 2005. Multiple dorsoventral origins of oligodendrocyte  
1182 generation in the spinal cord and hindbrain. *Neuron* **45**:55–67.  
1183 doi:10.1016/j.neuron.2004.12.026
- 1184 van Leeuwenhoek A. 1719. Epistola XXXII Epistolae Physiologicae Super Compluribus Naturae  
1185 Arcanis. Delft, Adrianum Beman. pp. 309–317.
- 1186 Wang F, Ren S-Y, Chen J-F, Liu K, Li R-X, Li Z-F, Hu B, Niu J-Q, Xiao L, Chan JR, Mei F. 2020.  
1187 Myelin degeneration and diminished myelin renewal contribute to age-related deficits in  
1188 memory. *Nat Neurosci* **23**:481–486. doi:10.1038/s41593-020-0588-8
- 1189 Wang XJ, Buzsáki G. 1996. Gamma oscillation by synaptic inhibition in a hippocampal  
1190 interneuronal network model. *J Neurosci* **16**:6402–6413. doi:10.1523/jneurosci.16-20-  
1191 06402.1996
- 1192 Yamahachi H, Marik SA, McManus JNJ, Denk W, Gilbert CD. 2009. Rapid Axonal Sprouting

- 1193 and Pruning Accompany Functional Reorganization in Primary Visual Cortex. *Neuron*  
1194 **64**:719–729. doi:10.1016/J.NEURON.2009.11.026
- 1195 Yeung MSYSY, Zdunek S, Bergmann O, Bernard S, Salehpour M, Alkass K, Perl S, Tisdale J,  
1196 Possnert G, Brundin L, Druid H, Frisén J. 2014. Dynamics of Oligodendrocyte Generation  
1197 and Myelination in the Human Brain. *Cell* **159**:766–774. doi:10.1016/j.cell.2014.10.011
- 1198 Young KM, Psachoulia K, Tripathi RB, Dunn SJ, Cossell L, Attwell D, Tohyama K, Richardson  
1199 WD. 2013. Oligodendrocyte dynamics in the healthy adult CNS: Evidence for myelin  
1200 remodeling. *Neuron* **77**:873–885. doi:10.1016/j.neuron.2013.01.006
- 1201 Ziabreva I, Campbell G, Rist J, Zamboni J, Rorbach J, Wydro MM, Lassmann H, Franklin RJM,  
1202 Mahad D. 2010. Injury and differentiation following inhibition of mitochondrial respiratory  
1203 chain complex IV in rat oligodendrocytes. *Glia* **58**:1827–1837. doi:10.1002/glia.21052
- 1204 Zonouzi M, Berger D, Jokhi V, Kedaigle A, Lichtman J, Arlotta P. 2019. Individual  
1205 Oligodendrocytes Show Bias for Inhibitory Axons in the Neocortex. *Cell Rep* **27**:2799-  
1206 2808.e3. doi:10.1016/j.celrep.2019.05.018
